# Supplementary material for: Using Community-Level Prevalence of Loa loa Infection to Predict the Proportion of Highly-Infected Individuals: Statistical Modelling to Support Lymphatic Filariasis and Onchocerciasis Elimination Programs
Source: PubMed Central journal article supplement (PMC5132393; doi:10.1371/journal.pntd.0005157), 2016-12-01
Supplement: pntd.0005157.s001.pdf [file pntd.0005157.s001.pdf]

# Supplementary Material

accompanying manuscript:

”Using community-level prevalence of *Loa loa* infection to predict the proportion of highly-infected individuals: statistical modelling to support lymphatic filariasis elimination programs”

Daniela K Schlüter, Martial L Ndeffo-Mbah, Innocent Takougang, Tony Ukety, Samuel Wanji, Alison P Galvani, and Peter J Diggle

## S.1 Data-analysis to support the adoption of a single Weibull shape parameter $\kappa$ for all villages.

Figure A shows the empirical distributions of the maximum likelihood estimates,  $\log\{\hat{\rho}_i/\{1-\rho_i\}\}$ ,  $\log(\hat{\lambda}_i)$  and  $\hat{\kappa}_i$  estimated separately for each of the 156 villages that returned four or more positive results.

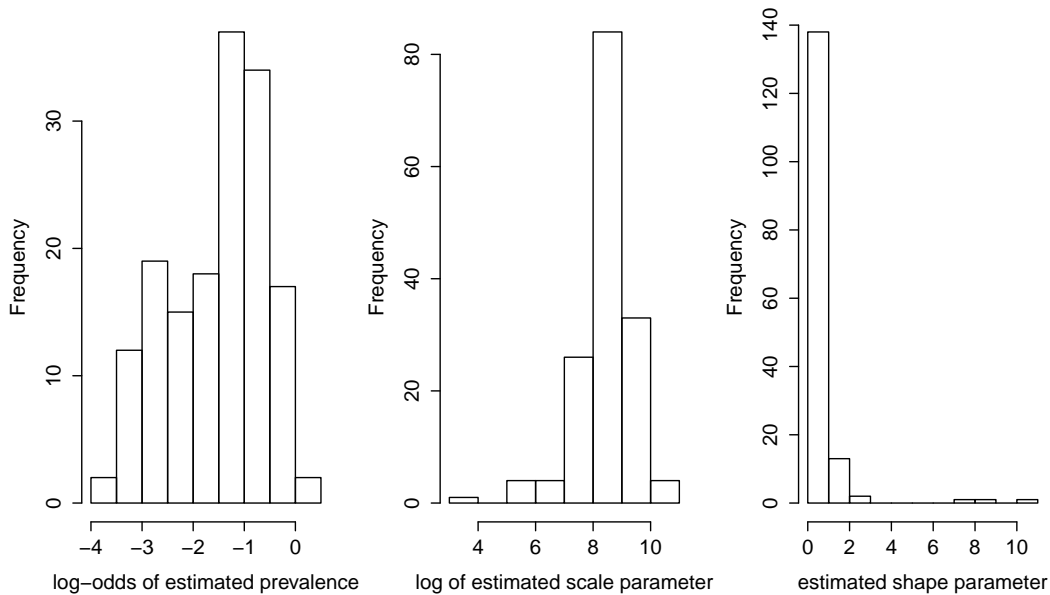

**Figure A:** Parameter estimates for the Weibull model fitted separately to each of 156 villages.

The empirical distributions of  $\log\{\hat{\rho}_i/\{1 - \rho_i\}\}$  and of  $\log(\hat{\lambda}_i)$  are unimodal and moderately negatively skewed, suggesting that linear mixed effects modelling on these transformed scales is not unreasonable. The empirical distribution of the  $\hat{\kappa}_i$  is extremely skewed, with most values less than 1; also, the larger values of  $\hat{\kappa}_i$  have larger associated standard errors. The likelihood-ratio statistic indicates a significant difference between a model with a single shape parameter  $\kappa$ , estimated as  $\hat{\kappa} = 0.55$ , and 156 separate parameters  $\kappa_i$  ( $D = 239$  on 155 degrees of freedom,  $p < 0.001$ ). However, estimates for the village-specific prevalences  $\hat{\rho}_i$  and scale parameters  $\hat{\lambda}_i$  were almost unchanged whether or not we estimated separate values of  $\kappa$  for each village (Figure B).

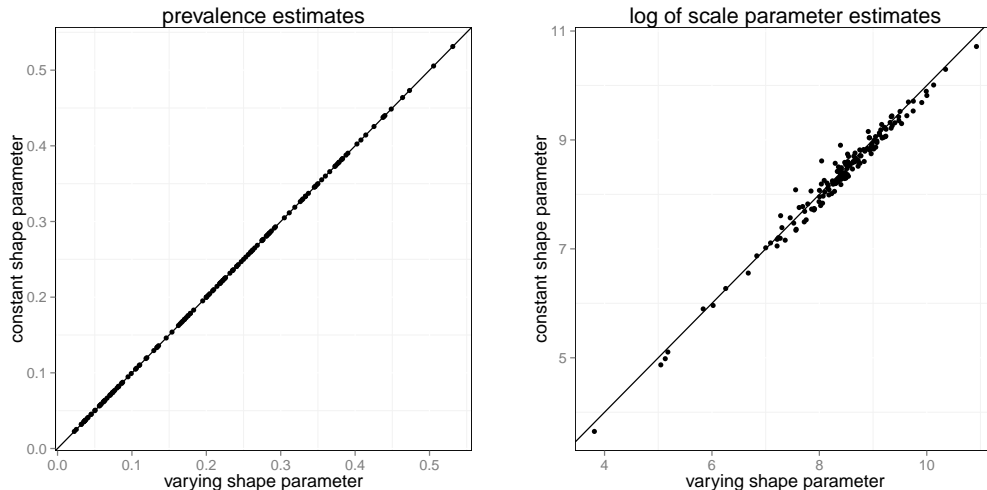

**Figure B:** Estimated village-specific prevalences  $\rho_i$  shape parameters  $\lambda_i$  for a common value of the shape parameter,  $\hat{\kappa} = 0.55$ , against the corresponding estimated values allowing village-specific estimates  $\hat{\kappa}_i$ .

## S.2 Parameter estimation

Parameters were estimated using maximum likelihood in conjunction with a quasi-Monte Carlo algorithm to evaluate the integrals on the right-hand side of equation (6) (main article). The algorithm was implemented using a two-dimensional Halton sequence for the generation of the integration points. The number of points used was 1000. All the candidate covariates included in the model were centred. Maximum NDVI was centered at 0.8, elevation at 1000 and the remaining covariates at their observed means. Numerical maximisation of the likelihood was performed with the R function `nlminb()` which uses PORT routines for optimisation. These routines are based on a reverse-communication trust-region quasi-Newton method.

For the numerical optimisation, transformed parameters with unconstrained ranges were used. The correspondence between the transformed parameters  $\theta$ , as listed in Table A, and the original parameterisation is as follows for the model without covariates:  $\theta_1$  is the intercept for the regression on the log-odds of prevalence;  $\theta_2$  is the intercept for the regression on

$\log(\lambda)$ ;  $\theta_3$  is the logarithm of the shape parameter  $\kappa$  in the Weibull distribution;  $\theta_4$  and  $\theta_5$  are the logarithms of the variances,  $\sigma_U^2$  and  $\sigma_V^2$  respectively, of the random effects  $U$  and  $V$ ;  $\theta_6$  is  $\log\{(1 + \phi)/(1 - \phi)\}$  where  $\phi$  is the correlation between  $U$  and  $V$ .

For the model with covariates the correspondence is:  $\theta_1$  is the intercept for the regression on the log-odds of prevalence;  $\theta_2$  is the slope parameter for the effect of forest cover on the log-odds of prevalence;  $\theta_3$  and  $\theta_4$  are the slope parameters for the elevation effect on log-odds of prevalence covering the elevation ranges 0-1000 and 1000+, respectively;  $\theta_5$  is the slope parameter for the effect of temperature ( $\times 10$ ) on log-odds of prevalence;  $\theta_6$  is the intercept for the regression on  $\log(\lambda)$ ;  $\theta_7$  is the slope parameters for the effect of forest cover on  $\log(\lambda)$ ;  $\theta_8$  and  $\theta_9$  are the slope parameters for the elevation effect on  $\log(\lambda)$  covering the elevation ranges 0-1000 and 1000+, respectively;  $\theta_{10}$  is the slope parameters for the effect of temperature ( $\times 10$ ) on  $\log(\lambda)$ ;  $\theta_{11}$  is the logarithm of the shape parameter  $\kappa$  in the Weibull distribution;  $\theta_{12}$  and  $\theta_{13}$  are the logarithms of the variances,  $\sigma_U^2$  and  $\sigma_V^2$  respectively, of the random effects  $U$  and  $V$ ;  $\theta_{14}$  is  $\log\{(1 + \phi)/(1 - \phi)\}$  where  $\phi$  is the correlation between  $U$  and  $V$ .

For the model that uses site as a covariate the correspondence is as follows:  $\theta_1$  is the intercept for the regression on the log-odds of prevalence;  $\theta_2$  to  $\theta_5$  are the differences in effect on the log-odds of prevalence between the study site being DRC North-West, Congo, Cameroon West and Cameroon East, respectively, and it being DRC Bas Congo;  $\theta_6$  is the intercept for the regression on  $\log(\lambda)$ ;  $\theta_7$  to  $\theta_{10}$  are the differences in effect on  $\log(\lambda)$  between the study site being DRC North-West, Congo, Cameroon West and Cameroon East, respectively, and it being DRC Bas Congo;  $\theta_{11}$  is the logarithm of the shape parameter  $\kappa$  in the Weibull distribution;  $\theta_{12}$  and  $\theta_{13}$  are the logarithms of the variances,  $\sigma_U^2$  and  $\sigma_V^2$  respectively, of the random effects  $U$  and  $V$ ;  $\theta_{14}$  is  $\log\{(1 + \phi)/(1 - \phi)\}$  where  $\phi$  is the correlation between  $U$  and  $V$ .

Estimates and standard errors for the transformed parameters, and 95% confidence intervals for the original parameters, are given in Table A.

### S.3 Algorithm to simulate samples from the plug-in predictive distribution

Let  $Z$  denote the number of infected individuals out of a sample of size  $n$ ,  $Y$  the vector of infection levels for each of the infected individuals, and  $(U, V)$  the bivariate random effect, as defined in equations (3) and (4) (main article). Write  $T = \rho(U)\{1 - G(c; V)\}$ , suppressing the dependence of  $T$  on model parameters and covariates as these are assumed known. We wish to draw samples from the predictive distribution of  $T$  given  $Z$  and  $n$ .

**Table A:** Parameter estimates for the final model. Estimates and standard errors are for the parameterisation described above. 95% confidence intervals are on the natural scale for each parameter.

| Parameter                          | Estimate  | Std.Error | Parameter     | 95% CI              |
|------------------------------------|-----------|-----------|---------------|---------------------|
| model without covariates           |           |           |               |                     |
| $\theta_1$                         | -2.47     | 0.125     | $\theta_1$    | -2.71, -2.22        |
| $\theta_2$                         | 8.2       | 0.0971    | $\theta_2$    | 8.01, 8.39          |
| $\theta_3$                         | -0.588    | 0.0149    | $\kappa$      | 0.539, 0.572        |
| $\theta_4$                         | 1.06      | 0.128     | $\sigma_U^2$  | 2.26, 3.72          |
| $\theta_5$                         | -0.739    | 0.268     | $\sigma_V^2$  | 0.283, 0.807        |
| $\theta_6$                         | 1.91      | 0.364     | $\phi$        | 0.534, 0.864        |
| model with covariates              |           |           |               |                     |
| $\theta_1$                         | -2.91     | 0.219     | $\theta_1$    | -3.34, -2.48        |
| $\theta_2$                         | 2.27      | 0.33      | $\theta_2$    | 1.62, 2.91          |
| $\theta_3$                         | -0.00169  | 0.000529  | $\theta_3$    | -0.00263, -0.000657 |
| $\theta_4$                         | -0.00156  | 0.000927  | $\theta_4$    | -0.00338, 0.000258  |
| $\theta_5$                         | -0.036    | 0.0146    | $\theta_5$    | -0.0645, -0.00748   |
| $\theta_6$                         | 7.99      | 0.172     | $\theta_6$    | 7.65, 8.33          |
| $\theta_7$                         | 0.7       | 0.236     | $\theta_7$    | 0.237, 1.16         |
| $\theta_8$                         | -0.000787 | 0.000341  | $\theta_8$    | -0.00146, -0.000119 |
| $\theta_9$                         | -0.000814 | 0.000644  | $\theta_9$    | -0.00208, 0.000448  |
| $\theta_{10}$                      | -0.0254   | 0.00894   | $\theta_{10}$ | -0.0429, -0.00787   |
| $\theta_{11}$                      | -0.588    | 0.0149    | $\kappa$      | 0.539, 0.572        |
| $\theta_{12}$                      | 0.727     | 0.12      | $\sigma_U^2$  | 1.637, 2.616        |
| $\theta_{13}$                      | -0.967    | 0.254     | $\sigma_V^2$  | 0.231, 0.625        |
| $\theta_{14}$                      | 1.66      | 0.346     | $\phi$        | 0.454, 0.824        |
| model with study site as covariate |           |           |               |                     |
| $\theta_1$                         | -2.75     | 0.251     | $\theta_1$    | -3.24, -2.25        |
| $\theta_2$                         | -0.506    | 0.334     | $\theta_2$    | -1.16, 0.149        |
| $\theta_3$                         | 0.733     | 0.339     | $\theta_3$    | 0.0684, 1.397       |
| $\theta_4$                         | -0.159    | 0.348     | $\theta_4$    | -0.833, 0.514       |
| $\theta_5$                         | 1.86      | 0.362     | $\theta_5$    | 1.152, 2.57         |
| $\theta_6$                         | 8.1       | 0.157     | $\theta_6$    | 7.79, 8.41          |
| $\theta_7$                         | -0.12     | 0.193     | $\theta_7$    | -0.497, 0.259       |
| $\theta_8$                         | 0.339     | 0.182     | $\theta_8$    | -0.0178, 0.696      |
| $\theta_9$                         | -0.235    | 0.188     | $\theta_9$    | -0.603, 0.133       |
| $\theta_{10}$                      | 0.783     | 0.192     | $\theta_{10}$ | 0.407, 1.16         |
| $\theta_{11}$                      | -0.589    | 0.015     | $\kappa$      | 0.539, 0.571        |
| $\theta_{12}$                      | 0.803     | 0.128     | $\sigma_U^2$  | 1.74, 2.87          |
| $\theta_{13}$                      | -1.19     | 0.287     | $\sigma_V^2$  | 0.173, 0.533        |
| $\theta_{14}$                      | 1.5       | 0.388     | $\phi$        | 0.355, 0.812        |

In general we can factorise the joint distribution of the random variables  $U$ ,  $V$ ,  $Z$  and  $Y$  as

$$[U, V, Z, Y] = [U][V|U][Z|U, V][Y|U, V, Z]. \quad (1)$$

Integrating both sides of (1) with respect to  $Y$  gives

$$[U, V, Z] = [U][V|U][Z|U, V]. \quad (2)$$

For the model defined by equations (2), (3) and (4) (main article),  $[Z|U, V] = [Z|U]$ , hence

$$[U, V, Z] = [U][Z|U] \times [V|U] \quad (3)$$

Also,  $[V|U]$  is a univariate Normal distribution with known mean and variance,  $m = \phi U \times \sigma_U / \sigma_V$  and  $v = (1 - \phi^2) \sigma_V^2$ . Hence, the problem reduces to sampling first a value,  $u$  say, from the predictive distribution  $[U|Z]$  and then sampling from the Normal distribution  $[V|u]$ . The second of these is straightforward; we used the R function `rnorm()`. For the first, write

$$[U|Z] = [U][Z|U] / [Z]$$

The algebraic expressions for each of  $[U]$  and  $[Z|U]$  are known; the former is a univariate Normal density, the latter a binomial probability with  $n$  trials and success probability  $\rho(U)$ . The marginal distribution of  $Z$ ,  $[Z] = \int_{-\infty}^{+\infty} [U][Z|U] du$ , can easily be calculated using Gauss-Hermite quadrature. Thus knowing the probability distribution  $[U|Z]$ , we can sample from it using the inverse probability integral transform as follows.

First we compute a look-up table for the cumulative distribution  $F(U|Z)$  for all the combinations of  $n$  and  $Z$  observed in the data. For this we generate an equally spaced vector of possible values of  $U$  covering the interval  $[\mu_u - 3\sigma_u, \mu_u + 3\sigma_u]$  with a spacing of 0.1. The cumulative probability  $F(U = u_i|Z)$  of each of these values  $u_i$ , is approximated by

$$F(u_i|Z) = \begin{cases} 0, & u_i < \mu_u - 3\sigma_u \\ 0.1 \times \sum_{l=1}^i [U = \frac{1}{2}(u_{l-1} + u_l)|Z], & u_i \in [\mu_u - 3\sigma_u, \mu_u + 3\sigma_u] \\ 1, & u_i > \mu_u + 3\sigma_u. \end{cases}$$

Given  $n$  and  $Z$  for a specific village, a sample from  $[U|Z]$  is then generated through the following steps.

1. generate a sample  $y_1, \dots, y_n$  from the uniform distribution  $\mathcal{U}(0,1)$
2. for each element  $y_j$  of this sample, find the largest cumulative probability  $F(u_i|Z)$  for the given  $n$  and  $Z$  such that  $y_j \geq F(u_i|Z)$
3. if  $y_j = F(u_i|Z)$ , the corresponding sample from  $[U|Z]$  is  $u_i$ , otherwise the corresponding sample will lie between  $u_i$  and  $u_{i+1}$  and we estimate it by linearly interpolating the two points and inverting this line at  $y_j$ .

Using the above approach we generate 100 000 samples from  $[U|Z]$ , and in turn from  $[V|U]$ , which we then use to calculate the sampled values from the plug-in predictive distribution of  $T$ .

Table B gives point predictions and 95% predictive intervals for  $T = P(Y > 8000/\text{ml blood})$  for each of the 222 villages.

**Table B:** Model-based point predictions and 95% prediction intervals (PI) for  $T$ , the proportion of individuals with parasite counts greater than 8000/ml blood. Predictions are made for each of the 222 villages for which data are available, using the fitted model without covariates. Point predictions and 95% prediction intervals resulting from a sensitivity analysis (SA) (see main article) are also given

| Village | $n$ | $Z$ | Point prediction | 95% PI             | Point prediction (SA) | 95% PI (SA)        |
|---------|-----|-----|------------------|--------------------|-----------------------|--------------------|
| 301     | 49  | 19  | 1.19E-01         | 4.84E-02, 2.23E-01 | 1.20E-01              | 4.73E-02, 2.27E-01 |
| 302     | 47  | 20  | 1.35E-01         | 5.63E-02, 2.46E-01 | 1.35E-01              | 5.54E-02, 2.48E-01 |
| 303     | 57  | 25  | 1.42E-01         | 6.17E-02, 2.51E-01 | 1.42E-01              | 6.10E-02, 2.55E-01 |
| 304     | 68  | 16  | 6.29E-02         | 2.23E-02, 1.30E-01 | 6.29E-02              | 2.23E-02, 1.31E-01 |
| 305     | 61  | 19  | 9.02E-02         | 3.52E-02, 1.74E-01 | 9.00E-02              | 3.39E-02, 1.74E-01 |
| 306     | 84  | 22  | 7.30E-02         | 2.82E-02, 1.42E-01 | 7.27E-02              | 2.81E-02, 1.44E-01 |
| 307     | 53  | 4   | 1.43E-02         | 2.50E-03, 4.80E-02 | 1.43E-02              | 2.28E-03, 4.76E-02 |
| 308     | 54  | 14  | 7.05E-02         | 2.49E-02, 1.46E-01 | 7.02E-02              | 2.36E-02, 1.47E-01 |
| 309     | 85  | 17  | 5.14E-02         | 1.81E-02, 1.07E-01 | 5.12E-02              | 1.78E-02, 1.09E-01 |
| 310     | 78  | 27  | 1.05E-01         | 4.42E-02, 1.91E-01 | 1.04E-01              | 4.35E-02, 1.93E-01 |
| 311     | 85  | 24  | 8.06E-02         | 3.20E-02, 1.53E-01 | 8.05E-02              | 3.21E-02, 1.53E-01 |
| 312     | 28  | 6   | 5.12E-02         | 1.27E-02, 1.35E-01 | 5.11E-02              | 1.22E-02, 1.35E-01 |
| 313     | 82  | 14  | 4.18E-02         | 1.37E-02, 9.20E-02 | 4.16E-02              | 1.31E-02, 9.27E-02 |
| 314     | 70  | 23  | 9.74E-02         | 3.96E-02, 1.82E-01 | 9.73E-02              | 3.85E-02, 1.83E-01 |
| 315     | 32  | 9   | 7.50E-02         | 2.34E-02, 1.70E-01 | 7.46E-02              | 2.32E-02, 1.70E-01 |
| 316     | 100 | 21  | 5.53E-02         | 2.04E-02, 1.11E-01 | 5.50E-02              | 2.03E-02, 1.10E-01 |
| 317     | 80  | 21  | 7.34E-02         | 2.86E-02, 1.43E-01 | 7.28E-02              | 2.76E-02, 1.45E-01 |
| 318     | 81  | 18  | 5.89E-02         | 2.15E-02, 1.20E-01 | 5.87E-02              | 2.08E-02, 1.21E-01 |
| 319     | 57  | 10  | 4.23E-02         | 1.27E-02, 9.97E-02 | 4.25E-02              | 1.19E-02, 1.00E-01 |
| 320     | 91  | 25  | 7.82E-02         | 3.13E-02, 1.48E-01 | 7.84E-02              | 3.10E-02, 1.49E-01 |
| 321     | 66  | 22  | 9.91E-02         | 4.02E-02, 1.86E-01 | 9.97E-02              | 3.99E-02, 1.86E-01 |
| 322     | 84  | 24  | 8.19E-02         | 3.26E-02, 1.56E-01 | 8.20E-02              | 3.17E-02, 1.56E-01 |
| 323     | 98  | 7   | 1.37E-02         | 3.14E-03, 3.84E-02 | 1.38E-02              | 2.96E-03, 3.88E-02 |
| 324     | 85  | 11  | 2.91E-02         | 8.62E-03, 6.97E-02 | 2.94E-02              | 8.41E-03, 7.08E-02 |
| 325     | 58  | 13  | 5.83E-02         | 1.98E-02, 1.26E-01 | 5.84E-02              | 1.93E-02, 1.26E-01 |
| 327     | 84  | 15  | 4.44E-02         | 1.50E-02, 9.56E-02 | 4.39E-02              | 1.45E-02, 9.66E-02 |
| 328     | 54  | 9   | 3.94E-02         | 1.12E-02, 9.56E-02 | 3.92E-02              | 1.09E-02, 9.44E-02 |
| 329     | 56  | 10  | 4.32E-02         | 1.32E-02, 1.02E-01 | 4.31E-02              | 1.27E-02, 1.01E-01 |
| 331     | 82  | 9   | 2.37E-02         | 6.37E-03, 6.02E-02 | 2.37E-02              | 6.20E-03, 6.07E-02 |

Continued on next page

Table B—continued from previous page

| Village | $n$ | $Z$ | Point prediction | 95% PI             | Point prediction (SA) | 95% PI (SA)        |
|---------|-----|-----|------------------|--------------------|-----------------------|--------------------|
| 332     | 75  | 3   | 6.65E-03         | 9.00E-04, 2.62E-02 | 6.57E-03              | 8.03E-04, 2.59E-02 |
| 333     | 86  | 2   | 3.57E-03         | 3.37E-04, 1.69E-02 | 3.59E-03              | 3.09E-04, 1.74E-02 |
| 334     | 33  | 0   | 1.62E-03         | 3.84E-05, 1.73E-02 | 1.60E-03              | 2.97E-05, 1.75E-02 |
| 335     | 57  | 0   | 1.01E-03         | 2.69E-05, 1.03E-02 | 9.95E-04              | 2.02E-05, 1.05E-02 |
| 336     | 42  | 1   | 4.02E-03         | 2.27E-04, 2.51E-02 | 4.06E-03              | 1.95E-04, 2.44E-02 |
| 338     | 60  | 1   | 2.79E-03         | 1.55E-04, 1.70E-02 | 2.74E-03              | 1.28E-04, 1.74E-02 |
| 339     | 55  | 2   | 5.99E-03         | 5.88E-04, 2.75E-02 | 5.99E-03              | 5.14E-04, 2.75E-02 |
| 340     | 51  | 1   | 3.29E-03         | 1.87E-04, 2.02E-02 | 3.37E-03              | 1.54E-04, 2.02E-02 |
| 341     | 85  | 6   | 1.34E-02         | 2.83E-03, 3.98E-02 | 1.35E-02              | 2.85E-03, 4.02E-02 |
| 342     | 54  | 4   | 1.38E-02         | 2.38E-03, 4.66E-02 | 1.40E-02              | 2.23E-03, 4.72E-02 |
| 343     | 48  | 10  | 5.22E-02         | 1.60E-02, 1.20E-01 | 5.22E-02              | 1.54E-02, 1.21E-01 |
| 344     | 85  | 2   | 3.61E-03         | 3.35E-04, 1.73E-02 | 3.72E-03              | 3.17E-04, 1.76E-02 |
| 345     | 73  | 3   | 6.85E-03         | 8.90E-04, 2.68E-02 | 6.82E-03              | 8.77E-04, 2.76E-02 |
| 346     | 83  | 3   | 5.90E-03         | 7.83E-04, 2.32E-02 | 5.93E-03              | 7.07E-04, 2.39E-02 |
| 347     | 90  | 20  | 5.93E-02         | 2.20E-02, 1.19E-01 | 5.93E-02              | 2.11E-02, 1.18E-01 |
| 348     | 60  | 2   | 5.37E-03         | 5.25E-04, 2.54E-02 | 5.39E-03              | 4.59E-04, 2.49E-02 |
| 349     | 27  | 1   | 6.38E-03         | 3.55E-04, 3.93E-02 | 6.22E-03              | 2.91E-04, 3.88E-02 |
| 350     | 60  | 2   | 5.41E-03         | 5.20E-04, 2.53E-02 | 5.38E-03              | 4.97E-04, 2.48E-02 |
| 351     | 90  | 6   | 1.25E-02         | 2.62E-03, 3.74E-02 | 1.26E-02              | 2.59E-03, 3.88E-02 |
| 352     | 50  | 6   | 2.54E-02         | 5.90E-03, 7.20E-02 | 2.58E-02              | 5.73E-03, 7.16E-02 |
| 353     | 50  | 4   | 1.51E-02         | 2.63E-03, 5.09E-02 | 1.51E-02              | 2.52E-03, 5.09E-02 |
| 201     | 81  | 14  | 4.24E-02         | 1.43E-02, 9.32E-02 | 4.21E-02              | 1.35E-02, 9.20E-02 |
| 202     | 80  | 7   | 1.76E-02         | 4.14E-03, 4.87E-02 | 1.75E-02              | 4.06E-03, 4.95E-02 |
| 203     | 84  | 29  | 1.05E-01         | 4.45E-02, 1.89E-01 | 1.05E-01              | 4.25E-02, 1.90E-01 |
| 204     | 82  | 16  | 4.97E-02         | 1.72E-02, 1.04E-01 | 5.00E-02              | 1.68E-02, 1.06E-01 |
| 205     | 81  | 31  | 1.21E-01         | 5.22E-02, 2.13E-01 | 1.21E-01              | 5.16E-02, 2.12E-01 |
| 206     | 82  | 25  | 8.87E-02         | 3.59E-02, 1.66E-01 | 8.93E-02              | 3.56E-02, 1.69E-01 |
| 207     | 86  | 29  | 1.02E-01         | 4.28E-02, 1.84E-01 | 1.02E-01              | 4.23E-02, 1.84E-01 |
| 208     | 82  | 19  | 6.21E-02         | 2.29E-02, 1.25E-01 | 6.17E-02              | 2.30E-02, 1.28E-01 |
| 209     | 85  | 20  | 6.35E-02         | 2.38E-02, 1.26E-01 | 6.38E-02              | 2.32E-02, 1.28E-01 |
| 210     | 81  | 27  | 1.00E-01         | 4.15E-02, 1.83E-01 | 9.98E-02              | 4.06E-02, 1.84E-01 |
| 211     | 80  | 22  | 7.77E-02         | 3.03E-02, 1.49E-01 | 7.69E-02              | 2.99E-02, 1.48E-01 |
| 212     | 80  | 18  | 5.98E-02         | 2.19E-02, 1.22E-01 | 5.98E-02              | 2.13E-02, 1.23E-01 |
| 213     | 80  | 28  | 1.07E-01         | 4.50E-02, 1.93E-01 | 1.07E-01              | 4.32E-02, 1.98E-01 |
| 214     | 81  | 27  | 1.00E-01         | 4.14E-02, 1.82E-01 | 1.01E-01              | 4.09E-02, 1.82E-01 |
| 215     | 80  | 23  | 8.24E-02         | 3.26E-02, 1.57E-01 | 8.23E-02              | 3.16E-02, 1.59E-01 |
| 216     | 69  | 1   | 2.38E-03         | 1.35E-04, 1.48E-02 | 2.41E-03              | 1.27E-04, 1.49E-02 |
| 217     | 93  | 0   | 6.34E-04         | 2.03E-05, 6.31E-03 | 6.45E-04              | 1.34E-05, 6.37E-03 |
| 218     | 96  | 0   | 6.19E-04         | 2.01E-05, 5.99E-03 | 6.54E-04              | 1.33E-05, 6.35E-03 |
| 219     | 88  | 2   | 3.47E-03         | 3.33E-04, 1.66E-02 | 3.50E-03              | 3.05E-04, 1.68E-02 |
| 220     | 78  | 0   | 7.53E-04         | 2.23E-05, 7.62E-03 | 7.49E-04              | 1.56E-05, 7.72E-03 |

Continued on next page

Table B—continued from previous page

| Village | $n$ | $Z$ | Point prediction | 95% PI             | Point prediction (SA) | 95% PI (SA)        |
|---------|-----|-----|------------------|--------------------|-----------------------|--------------------|
| 221     | 84  | 0   | 7.10E-04         | 2.17E-05, 7.03E-03 | 7.15E-04              | 1.53E-05, 6.89E-03 |
| 222     | 89  | 0   | 6.72E-04         | 2.12E-05, 6.55E-03 | 6.79E-04              | 1.44E-05, 6.74E-03 |
| 223     | 85  | 0   | 6.99E-04         | 2.16E-05, 6.90E-03 | 7.07E-04              | 1.63E-05, 6.85E-03 |
| 224     | 85  | 0   | 7.07E-04         | 2.23E-05, 7.01E-03 | 7.04E-04              | 1.66E-05, 7.22E-03 |
| 225     | 81  | 1   | 2.03E-03         | 1.15E-04, 1.25E-02 | 2.02E-03              | 9.53E-05, 1.31E-02 |
| 226     | 86  | 0   | 6.99E-04         | 2.15E-05, 6.81E-03 | 6.98E-04              | 1.62E-05, 6.90E-03 |
| 227     | 84  | 0   | 7.13E-04         | 2.28E-05, 7.07E-03 | 7.02E-04              | 1.59E-05, 7.26E-03 |
| 228     | 87  | 1   | 1.87E-03         | 1.08E-04, 1.16E-02 | 1.86E-03              | 9.29E-05, 1.18E-02 |
| 229     | 60  | 0   | 9.66E-04         | 2.81E-05, 9.75E-03 | 9.65E-04              | 2.09E-05, 1.02E-02 |
| 230     | 84  | 0   | 7.05E-04         | 2.19E-05, 6.93E-03 | 7.17E-04              | 1.28E-05, 7.04E-03 |
| 231     | 81  | 3   | 6.08E-03         | 7.93E-04, 2.40E-02 | 6.05E-03              | 7.09E-04, 2.39E-02 |
| 232     | 80  | 3   | 6.12E-03         | 8.06E-04, 2.43E-02 | 6.18E-03              | 7.67E-04, 2.46E-02 |
| 233     | 80  | 0   | 7.41E-04         | 2.24E-05, 7.37E-03 | 7.50E-04              | 1.59E-05, 7.56E-03 |
| 234     | 80  | 0   | 7.43E-04         | 2.27E-05, 7.41E-03 | 7.43E-04              | 1.74E-05, 7.20E-03 |
| 235     | 80  | 3   | 6.14E-03         | 8.02E-04, 2.44E-02 | 6.12E-03              | 7.78E-04, 2.37E-02 |
| 236     | 81  | 6   | 1.42E-02         | 3.07E-03, 4.22E-02 | 1.43E-02              | 2.71E-03, 4.27E-02 |
| 237     | 81  | 1   | 2.00E-03         | 1.16E-04, 1.24E-02 | 2.01E-03              | 9.20E-05, 1.25E-02 |
| 238     | 81  | 3   | 6.05E-03         | 8.18E-04, 2.41E-02 | 6.09E-03              | 7.36E-04, 2.42E-02 |
| 239     | 80  | 4   | 8.68E-03         | 1.43E-03, 3.04E-02 | 8.65E-03              | 1.42E-03, 3.08E-02 |
| 240     | 80  | 20  | 6.87E-02         | 2.59E-02, 1.36E-01 | 6.83E-02              | 2.55E-02, 1.37E-01 |
| 241     | 85  | 0   | 6.96E-04         | 2.24E-05, 6.89E-03 | 7.13E-04              | 1.72E-05, 6.93E-03 |
| 242     | 46  | 0   | 1.21E-03         | 3.15E-05, 1.25E-02 | 1.27E-03              | 2.47E-05, 1.32E-02 |
| 243     | 82  | 0   | 7.24E-04         | 2.17E-05, 7.25E-03 | 7.45E-04              | 1.63E-05, 7.22E-03 |
| 244     | 85  | 7   | 1.63E-02         | 3.82E-03, 4.57E-02 | 1.65E-02              | 3.71E-03, 4.64E-02 |
| 245     | 85  | 3   | 5.67E-03         | 7.46E-04, 2.26E-02 | 5.75E-03              | 7.18E-04, 2.30E-02 |
| 246     | 89  | 4   | 7.63E-03         | 1.22E-03, 2.68E-02 | 7.69E-03              | 1.14E-03, 2.73E-02 |
| 247     | 85  | 5   | 1.06E-02         | 2.04E-03, 3.41E-02 | 1.09E-02              | 1.88E-03, 3.37E-02 |
| 248     | 89  | 2   | 3.45E-03         | 3.25E-04, 1.64E-02 | 3.50E-03              | 2.94E-04, 1.61E-02 |
| 249     | 80  | 0   | 7.45E-04         | 2.20E-05, 7.30E-03 | 7.54E-04              | 1.66E-05, 7.43E-03 |
| 250     | 87  | 0   | 6.87E-04         | 2.08E-05, 6.71E-03 | 7.03E-04              | 1.59E-05, 7.11E-03 |
| 101     | 79  | 16  | 5.21E-02         | 1.81E-02, 1.10E-01 | 5.23E-02              | 1.71E-02, 1.11E-01 |
| 102     | 79  | 19  | 6.51E-02         | 2.43E-02, 1.31E-01 | 6.50E-02              | 2.38E-02, 1.29E-01 |
| 103     | 80  | 16  | 5.13E-02         | 1.80E-02, 1.08E-01 | 5.09E-02              | 1.75E-02, 1.08E-01 |
| 104     | 81  | 20  | 6.77E-02         | 2.56E-02, 1.34E-01 | 6.77E-02              | 2.47E-02, 1.34E-01 |
| 105     | 78  | 17  | 5.73E-02         | 2.05E-02, 1.18E-01 | 5.70E-02              | 2.02E-02, 1.18E-01 |
| 106     | 76  | 29  | 1.19E-01         | 5.11E-02, 2.12E-01 | 1.19E-01              | 5.07E-02, 2.14E-01 |
| 107     | 83  | 20  | 6.55E-02         | 2.48E-02, 1.30E-01 | 6.54E-02              | 2.43E-02, 1.32E-01 |
| 108     | 82  | 31  | 1.18E-01         | 5.12E-02, 2.09E-01 | 1.18E-01              | 5.11E-02, 2.11E-01 |
| 109     | 64  | 14  | 5.71E-02         | 1.95E-02, 1.21E-01 | 5.66E-02              | 1.90E-02, 1.20E-01 |
| 110     | 76  | 21  | 7.79E-02         | 3.06E-02, 1.51E-01 | 7.91E-02              | 3.06E-02, 1.53E-01 |
| 111     | 88  | 15  | 4.19E-02         | 1.40E-02, 9.09E-02 | 4.19E-02              | 1.35E-02, 9.10E-02 |

Continued on next page



Table B—continued from previous page

| Village | $n$ | $Z$ | Point prediction | 95% PI             | Point prediction (SA) | 95% PI (SA)        |
|---------|-----|-----|------------------|--------------------|-----------------------|--------------------|
| 112     | 88  | 18  | 5.32E-02         | 1.92E-02, 1.10E-01 | 5.30E-02              | 1.84E-02, 1.11E-01 |
| 113     | 93  | 21  | 6.05E-02         | 2.26E-02, 1.20E-01 | 6.04E-02              | 2.15E-02, 1.22E-01 |
| 114     | 83  | 21  | 6.99E-02         | 2.68E-02, 1.37E-01 | 7.00E-02              | 2.62E-02, 1.37E-01 |
| 115     | 85  | 0   | 6.98E-04         | 2.15E-05, 6.95E-03 | 7.18E-04              | 1.53E-05, 7.29E-03 |
| 116     | 102 | 0   | 5.86E-04         | 1.94E-05, 5.75E-03 | 5.82E-04              | 1.38E-05, 5.68E-03 |
| 117     | 89  | 5   | 1.00E-02         | 1.91E-03, 3.21E-02 | 1.01E-02              | 1.72E-03, 3.21E-02 |
| 118     | 47  | 3   | 1.14E-02         | 1.58E-03, 4.34E-02 | 1.11E-02              | 1.36E-03, 4.37E-02 |
| 119     | 85  | 14  | 4.00E-02         | 1.31E-02, 8.83E-02 | 4.00E-02              | 1.24E-02, 8.70E-02 |
| 120     | 81  | 5   | 1.13E-02         | 2.16E-03, 3.59E-02 | 1.14E-02              | 2.03E-03, 3.60E-02 |
| 121     | 94  | 0   | 6.34E-04         | 2.02E-05, 6.21E-03 | 6.60E-04              | 1.36E-05, 6.35E-03 |
| 122     | 81  | 0   | 7.23E-04         | 2.26E-05, 7.16E-03 | 7.58E-04              | 1.72E-05, 7.69E-03 |
| 123     | 99  | 0   | 6.11E-04         | 1.97E-05, 5.97E-03 | 6.12E-04              | 1.44E-05, 6.17E-03 |
| 124     | 88  | 2   | 3.49E-03         | 3.32E-04, 1.64E-02 | 3.50E-03              | 3.02E-04, 1.66E-02 |
| 125     | 89  | 0   | 6.77E-04         | 2.11E-05, 6.56E-03 | 6.72E-04              | 1.37E-05, 6.52E-03 |
| 126     | 85  | 0   | 7.01E-04         | 2.18E-05, 6.83E-03 | 6.88E-04              | 1.46E-05, 6.67E-03 |
| 127     | 85  | 0   | 6.98E-04         | 2.16E-05, 6.85E-03 | 7.00E-04              | 1.68E-05, 6.95E-03 |
| 128     | 80  | 0   | 7.50E-04         | 2.25E-05, 7.45E-03 | 7.57E-04              | 1.54E-05, 7.54E-03 |
| 129     | 85  | 3   | 5.71E-03         | 7.50E-04, 2.28E-02 | 5.86E-03              | 6.78E-04, 2.34E-02 |
| 130     | 95  | 9   | 1.97E-02         | 5.19E-03, 5.08E-02 | 1.98E-02              | 5.03E-03, 5.14E-02 |
| 131     | 81  | 0   | 7.30E-04         | 2.22E-05, 7.27E-03 | 7.53E-04              | 1.61E-05, 7.30E-03 |
| 132     | 81  | 0   | 7.37E-04         | 2.20E-05, 7.21E-03 | 7.45E-04              | 1.66E-05, 7.50E-03 |
| 133     | 73  | 0   | 8.07E-04         | 2.39E-05, 8.08E-03 | 8.11E-04              | 1.53E-05, 8.14E-03 |
| 134     | 81  | 2   | 3.84E-03         | 3.76E-04, 1.81E-02 | 3.84E-03              | 3.24E-04, 1.85E-02 |
| 135     | 82  | 1   | 1.97E-03         | 1.10E-04, 1.24E-02 | 2.02E-03              | 1.06E-04, 1.21E-02 |
| 136     | 81  | 1   | 2.01E-03         | 1.11E-04, 1.26E-02 | 2.05E-03              | 9.74E-05, 1.34E-02 |
| 137     | 81  | 0   | 7.27E-04         | 2.23E-05, 7.29E-03 | 7.42E-04              | 1.62E-05, 7.27E-03 |
| 138     | 80  | 1   | 2.03E-03         | 1.14E-04, 1.27E-02 | 2.09E-03              | 9.86E-05, 1.27E-02 |
| 139     | 82  | 11  | 3.07E-02         | 9.15E-03, 7.26E-02 | 3.06E-02              | 9.17E-03, 7.40E-02 |
| 140     | 82  | 30  | 1.13E-01         | 4.87E-02, 2.02E-01 | 1.13E-01              | 4.76E-02, 2.03E-01 |
| 141     | 82  | 23  | 7.99E-02         | 3.16E-02, 1.53E-01 | 8.03E-02              | 3.05E-02, 1.52E-01 |
| 142     | 82  | 15  | 4.56E-02         | 1.54E-02, 9.86E-02 | 4.57E-02              | 1.46E-02, 9.83E-02 |
| 143     | 80  | 16  | 5.13E-02         | 1.78E-02, 1.08E-01 | 5.08E-02              | 1.69E-02, 1.07E-01 |
| 144     | 81  | 7   | 1.74E-02         | 4.10E-03, 4.82E-02 | 1.72E-02              | 3.79E-03, 4.87E-02 |
| 145     | 81  | 5   | 1.13E-02         | 2.19E-03, 3.59E-02 | 1.13E-02              | 2.00E-03, 3.59E-02 |
| 146     | 81  | 11  | 3.10E-02         | 9.16E-03, 7.36E-02 | 3.12E-02              | 8.87E-03, 7.44E-02 |
| 147     | 80  | 13  | 3.92E-02         | 1.26E-02, 8.76E-02 | 3.88E-02              | 1.21E-02, 8.79E-02 |
| 148     | 57  | 10  | 4.23E-02         | 1.27E-02, 9.95E-02 | 4.25E-02              | 1.21E-02, 9.95E-02 |
| 149     | 81  | 23  | 8.11E-02         | 3.20E-02, 1.55E-01 | 8.14E-02              | 3.19E-02, 1.57E-01 |
| 703     | 45  | 1   | 3.78E-03         | 2.14E-04, 2.31E-02 | 3.73E-03              | 2.05E-04, 2.37E-02 |
| 704     | 57  | 4   | 1.30E-02         | 2.20E-03, 4.39E-02 | 1.30E-02              | 2.01E-03, 4.37E-02 |
| 705     | 134 | 11  | 1.66E-02         | 4.60E-03, 4.13E-02 | 1.66E-02              | 4.41E-03, 4.17E-02 |

Continued on next page

Table B—continued from previous page

| Village | $n$ | $Z$ | Point prediction | 95% PI             | Point prediction (SA) | 95% PI (SA)        |
|---------|-----|-----|------------------|--------------------|-----------------------|--------------------|
| 706     | 121 | 7   | 1.06E-02         | 2.36E-03, 3.06E-02 | 1.06E-02              | 2.17E-03, 3.14E-02 |
| 707     | 158 | 10  | 1.19E-02         | 3.07E-03, 3.14E-02 | 1.20E-02              | 2.90E-03, 3.22E-02 |
| 708     | 128 | 8   | 1.17E-02         | 2.79E-03, 3.24E-02 | 1.17E-02              | 2.74E-03, 3.25E-02 |
| 709     | 174 | 15  | 1.79E-02         | 5.30E-03, 4.18E-02 | 1.81E-02              | 5.13E-03, 4.28E-02 |
| 710     | 107 | 18  | 4.15E-02         | 1.43E-02, 8.75E-02 | 4.12E-02              | 1.42E-02, 8.91E-02 |
| 711     | 181 | 20  | 2.46E-02         | 8.05E-03, 5.34E-02 | 2.48E-02              | 7.68E-03, 5.37E-02 |
| 712     | 30  | 4   | 2.78E-02         | 5.16E-03, 8.87E-02 | 2.75E-02              | 5.06E-03, 8.89E-02 |
| 714     | 26  | 4   | 3.28E-02         | 6.05E-03, 1.03E-01 | 3.31E-02              | 5.97E-03, 1.03E-01 |
| 715     | 39  | 3   | 1.41E-02         | 2.00E-03, 5.30E-02 | 1.43E-02              | 1.91E-03, 5.37E-02 |
| 716     | 66  | 3   | 7.72E-03         | 1.04E-03, 2.98E-02 | 7.74E-03              | 9.49E-04, 2.97E-02 |
| 717     | 24  | 1   | 7.08E-03         | 3.81E-04, 4.42E-02 | 7.10E-03              | 3.54E-04, 4.64E-02 |
| 718     | 88  | 5   | 1.03E-02         | 1.94E-03, 3.28E-02 | 1.01E-02              | 1.79E-03, 3.31E-02 |
| 720     | 195 | 0   | 3.14E-04         | 1.28E-05, 2.97E-03 | 3.22E-04              | 8.07E-06, 3.00E-03 |
| 721     | 125 | 4   | 5.10E-03         | 7.85E-04, 1.84E-02 | 5.06E-03              | 7.27E-04, 1.84E-02 |
| 722     | 115 | 3   | 3.97E-03         | 5.07E-04, 1.63E-02 | 4.02E-03              | 4.52E-04, 1.62E-02 |
| 723     | 146 | 1   | 1.05E-03         | 5.99E-05, 6.60E-03 | 1.06E-03              | 5.09E-05, 6.81E-03 |
| 724     | 78  | 1   | 2.11E-03         | 1.19E-04, 1.30E-02 | 2.09E-03              | 9.61E-05, 1.32E-02 |
| 725     | 68  | 5   | 1.40E-02         | 2.75E-03, 4.38E-02 | 1.42E-02              | 2.57E-03, 4.45E-02 |
| 726     | 119 | 3   | 3.82E-03         | 4.91E-04, 1.55E-02 | 3.85E-03              | 3.93E-04, 1.59E-02 |
| 727     | 94  | 3   | 5.06E-03         | 6.57E-04, 2.02E-02 | 5.09E-03              | 5.76E-04, 2.06E-02 |
| 728     | 91  | 46  | 1.76E-01         | 8.31E-02, 2.86E-01 | 1.76E-01              | 8.25E-02, 2.89E-01 |
| 729     | 112 | 49  | 1.45E-01         | 6.75E-02, 2.42E-01 | 1.46E-01              | 6.69E-02, 2.44E-01 |
| 730     | 96  | 51  | 1.88E-01         | 9.16E-02, 3.03E-01 | 1.87E-01              | 8.85E-02, 3.06E-01 |
| 731     | 70  | 29  | 1.33E-01         | 5.86E-02, 2.33E-01 | 1.33E-01              | 5.64E-02, 2.37E-01 |
| 732     | 52  | 18  | 1.03E-01         | 4.05E-02, 1.97E-01 | 1.03E-01              | 3.94E-02, 2.00E-01 |
| 733     | 229 | 24  | 2.33E-02         | 7.75E-03, 4.93E-02 | 2.31E-02              | 7.40E-03, 4.99E-02 |
| 734     | 111 | 11  | 2.11E-02         | 5.97E-03, 5.16E-02 | 2.10E-02              | 5.55E-03, 5.19E-02 |
| 735     | 66  | 7   | 2.22E-02         | 5.34E-03, 6.08E-02 | 2.25E-02              | 5.18E-03, 6.08E-02 |
| 736     | 107 | 48  | 1.50E-01         | 7.00E-02, 2.48E-01 | 1.50E-01              | 6.91E-02, 2.51E-01 |
| 737     | 95  | 31  | 9.82E-02         | 4.14E-02, 1.78E-01 | 9.84E-02              | 4.03E-02, 1.79E-01 |
| 739     | 151 | 0   | 4.02E-04         | 1.52E-05, 3.83E-03 | 4.22E-04              | 9.29E-06, 3.96E-03 |
| 740     | 140 | 0   | 4.37E-04         | 1.55E-05, 4.16E-03 | 4.36E-04              | 1.05E-05, 4.42E-03 |
| 741     | 52  | 0   | 1.10E-03         | 2.96E-05, 1.12E-02 | 1.08E-03              | 2.23E-05, 1.12E-02 |
| 742     | 186 | 0   | 3.26E-04         | 1.27E-05, 3.08E-03 | 3.32E-04              | 8.36E-06, 3.15E-03 |
| 743     | 126 | 0   | 4.79E-04         | 1.68E-05, 4.66E-03 | 4.99E-04              | 1.06E-05, 5.09E-03 |
| 744     | 105 | 0   | 5.73E-04         | 1.93E-05, 5.59E-03 | 5.74E-04              | 1.33E-05, 5.95E-03 |
| 745     | 133 | 3   | 3.35E-03         | 4.27E-04, 1.38E-02 | 3.42E-03              | 3.58E-04, 1.42E-02 |
| 746     | 212 | 0   | 2.87E-04         | 1.18E-05, 2.68E-03 | 2.95E-04              | 8.00E-06, 2.75E-03 |
| 901     | 118 | 26  | 5.91E-02         | 2.26E-02, 1.15E-01 | 5.90E-02              | 2.17E-02, 1.15E-01 |
| 902     | 127 | 37  | 8.52E-02         | 3.56E-02, 1.54E-01 | 8.58E-02              | 3.48E-02, 1.55E-01 |
| 903     | 123 | 32  | 7.37E-02         | 2.98E-02, 1.36E-01 | 7.42E-02              | 2.87E-02, 1.38E-01 |

Continued on next page

Table B—continued from previous page

| Village | $n$ | $Z$ | Point prediction | 95% PI             | Point prediction (SA) | 95% PI (SA)        |
|---------|-----|-----|------------------|--------------------|-----------------------|--------------------|
| 905     | 108 | 29  | 7.65E-02         | 3.06E-02, 1.42E-01 | 7.70E-02              | 2.97E-02, 1.44E-01 |
| 906     | 119 | 26  | 5.87E-02         | 2.26E-02, 1.14E-01 | 5.85E-02              | 2.24E-02, 1.15E-01 |
| 907     | 107 | 41  | 1.22E-01         | 5.43E-02, 2.09E-01 | 1.22E-01              | 5.34E-02, 2.12E-01 |
| 911     | 99  | 37  | 1.17E-01         | 5.14E-02, 2.04E-01 | 1.18E-01              | 5.05E-02, 2.08E-01 |
| 912     | 83  | 22  | 7.44E-02         | 2.86E-02, 1.43E-01 | 7.42E-02              | 2.80E-02, 1.45E-01 |
| 913     | 97  | 32  | 9.95E-02         | 4.26E-02, 1.79E-01 | 9.93E-02              | 4.08E-02, 1.79E-01 |
| 914     | 148 | 56  | 1.21E-01         | 5.54E-02, 2.03E-01 | 1.21E-01              | 5.37E-02, 2.06E-01 |
| 915     | 25  | 9   | 1.02E-01         | 3.37E-02, 2.20E-01 | 1.02E-01              | 3.26E-02, 2.27E-01 |
| 916     | 89  | 13  | 3.42E-02         | 1.07E-02, 7.78E-02 | 3.39E-02              | 1.03E-02, 7.59E-02 |
| 917     | 41  | 16  | 1.19E-01         | 4.70E-02, 2.29E-01 | 1.19E-01              | 4.66E-02, 2.29E-01 |
| 918     | 143 | 17  | 2.69E-02         | 8.67E-03, 5.94E-02 | 2.66E-02              | 8.52E-03, 5.95E-02 |
| 919     | 109 | 31  | 8.24E-02         | 3.35E-02, 1.52E-01 | 8.25E-02              | 3.29E-02, 1.52E-01 |
| 920     | 130 | 53  | 1.33E-01         | 6.11E-02, 2.23E-01 | 1.33E-01              | 6.05E-02, 2.25E-01 |
| 922     | 99  | 29  | 8.52E-02         | 3.46E-02, 1.58E-01 | 8.55E-02              | 3.49E-02, 1.59E-01 |
| 923     | 110 | 41  | 1.17E-01         | 5.22E-02, 2.02E-01 | 1.18E-01              | 5.09E-02, 2.05E-01 |
| 924     | 110 | 26  | 6.46E-02         | 2.52E-02, 1.24E-01 | 6.45E-02              | 2.47E-02, 1.24E-01 |
| 925     | 109 | 38  | 1.08E-01         | 4.66E-02, 1.88E-01 | 1.07E-01              | 4.63E-02, 1.88E-01 |
| 926     | 25  | 11  | 1.34E-01         | 4.91E-02, 2.69E-01 | 1.35E-01              | 4.71E-02, 2.68E-01 |
| 927     | 69  | 22  | 9.36E-02         | 3.76E-02, 1.76E-01 | 9.42E-02              | 3.73E-02, 1.78E-01 |
| 928     | 125 | 47  | 1.19E-01         | 5.34E-02, 2.03E-01 | 1.19E-01              | 5.13E-02, 2.04E-01 |
| 931     | 128 | 28  | 5.90E-02         | 2.29E-02, 1.14E-01 | 5.88E-02              | 2.18E-02, 1.14E-01 |
| 933     | 87  | 24  | 7.85E-02         | 3.09E-02, 1.49E-01 | 7.80E-02              | 2.96E-02, 1.51E-01 |
| 936     | 107 | 26  | 6.69E-02         | 2.60E-02, 1.28E-01 | 6.81E-02              | 2.65E-02, 1.30E-01 |
| 937     | 78  | 20  | 7.10E-02         | 2.69E-02, 1.39E-01 | 7.12E-02              | 2.67E-02, 1.40E-01 |
| 938     | 110 | 9   | 1.63E-02         | 4.23E-03, 4.29E-02 | 1.64E-02              | 4.22E-03, 4.28E-02 |
| 939     | 107 | 38  | 1.10E-01         | 4.81E-02, 1.93E-01 | 1.10E-01              | 4.69E-02, 1.95E-01 |
| 940     | 82  | 33  | 1.29E-01         | 5.70E-02, 2.23E-01 | 1.30E-01              | 5.60E-02, 2.27E-01 |
| 941     | 93  | 44  | 1.60E-01         | 7.49E-02, 2.65E-01 | 1.59E-01              | 7.50E-02, 2.67E-01 |
| 950     | 69  | 32  | 1.55E-01         | 7.02E-02, 2.63E-01 | 1.54E-01              | 6.73E-02, 2.63E-01 |

## S.4 Data-analysis to support exclusion of the available environmental covariates from the model.

Environmental covariate effects were statistically significant, but their inclusion made very little difference to predictions of the proportions of highly infected individuals in each village (Figure C).

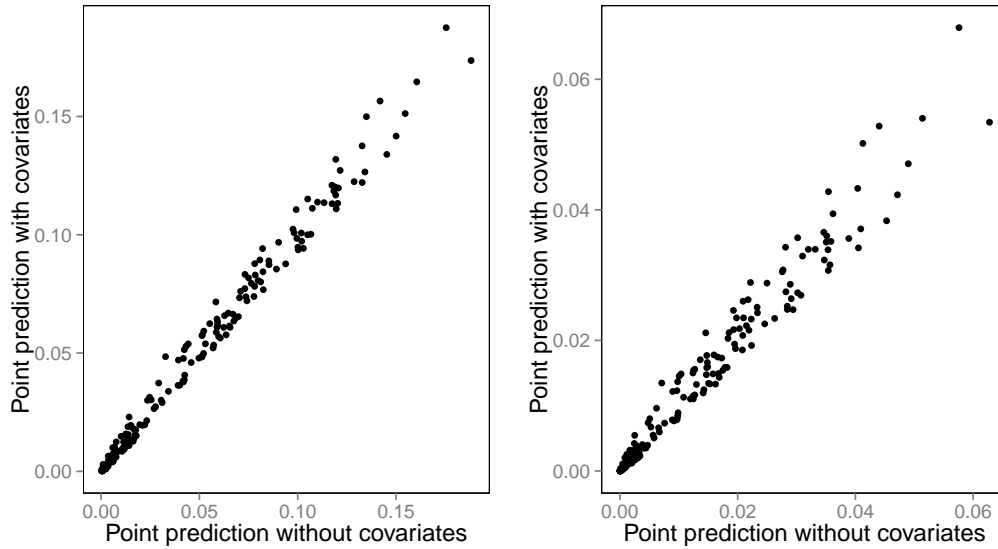

**Figure C:** Predicted proportions of highly infected individuals in the model that includes no environmental covariates against the corresponding predictions in the model that includes forest cover, elevation and temperature. In the left-hand panel, the threshold for high infection is  $c = 8000$ , in the right-hand panel the threshold is  $c = 30\,000$ .

### S.5 Data-analysis to show that site differences make a very small contribution to the variability between villages.

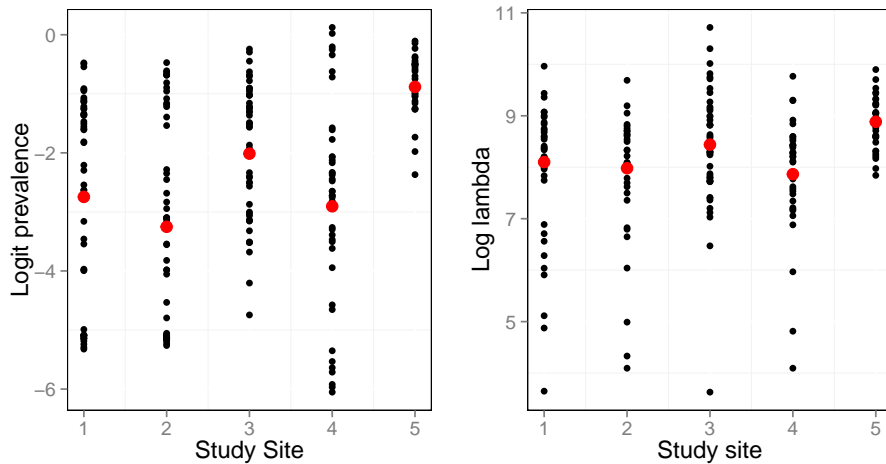

**Figure D:** Empirical log-odds of the prevalence and log lambda plotted against study site. Red dots show the fitted coefficients for each study-site in the logistic linear model for prevalence (left-hand panel) and in the log-linear model for intensity of infection (right-hand panel).

## S.6 Model Validation

Although desirable, formal model validation is not possible as the target of prediction, the proportion of individuals in a village, which exceeds infection levels of a certain threshold, cannot be observed unless all individuals in a community are tested and their blood samples analysed. However, in order to get a sense of the accuracy of out-of-sample predictions, we predict the proportions of highly infected individuals in communities and compare these with the observed proportion of highly infected individuals in the samples and their 95% confidence intervals based on the binomial sampling distribution for datasets from Cameroon, Gabon and Equatorial Guinea that have not been used in the model development. The following tables and figures show the results of this.

## Cameroon

**Table C:** Model-based 95% prediction intervals (PI) for  $T$ , the proportion of individuals with parasite counts greater than 8000/ml blood and the proportion of individuals with parasite counts greater than 30000/ml blood as well as the 95% confidence intervals for the true proportions based on the binomial sampling distribution of the observed numbers in each village.  $n$ , the number of individuals tested,  $Z$ , the number of individuals tested positive for *Loa Loa*,  $Prop_{8k}$  is the observed proportion with infection levels greater than 8000mf/ml blood,  $Prop_{30k}$  is the observed proportion with infection levels greater than 30000mf/ml blood

| Village | $n$ | $Z$ | $Prop_{8k}$ | 95% $PI_{8k}$      | 95% $CI_{8k}$      | $Prop_{30k}$ | 95% $PI_{30k}$     | 95% $CI_{30k}$     |
|---------|-----|-----|-------------|--------------------|--------------------|--------------|--------------------|--------------------|
| NA      | 24  | 7   | 4.20E-02    | 2.15E-02, 1.82E-01 | 9.00E-03, 1.67E-01 | 0.00E+00     | 2.53E-03, 7.80E-02 | 0.00E+00, 1.01E-01 |
| NA      | 25  | 11  | 2.00E-01    | 4.92E-02, 2.68E-01 | 1.01E-01, 3.58E-01 | 8.00E-02     | 7.10E-03, 1.26E-01 | 2.70E-02, 2.15E-01 |
| NA      | 27  | 7   | 1.11E-01    | 1.85E-02, 1.62E-01 | 4.50E-02, 2.48E-01 | 3.70E-02     | 2.03E-03, 6.69E-02 | 8.00E-03, 1.50E-01 |
| NA      | 29  | 14  | 6.90E-02    | 6.16E-02, 2.90E-01 | 2.30E-02, 1.88E-01 | 3.40E-02     | 9.31E-03, 1.40E-01 | 8.00E-03, 1.41E-01 |
| NA      | 40  | 17  | 2.50E-02    | 5.43E-02, 2.49E-01 | 6.00E-03, 1.05E-01 | 0.00E+00     | 7.69E-03, 1.17E-01 | 0.00E+00, 6.30E-02 |
| NA      | 51  | 45  | 0.00E+00    | 2.27E-01, 5.59E-01 | 0.00E+00, 5.00E-02 | 0.00E+00     | 5.76E-02, 3.41E-01 | 0.00E+00, 5.00E-02 |
| NA      | 59  | 10  | 1.02E-01    | 1.21E-02, 9.55E-02 | 5.40E-02, 1.85E-01 | 1.70E-02     | 1.10E-03, 3.71E-02 | 4.00E-03, 7.20E-02 |
| NA      | 62  | 20  | 8.10E-02    | 3.77E-02, 1.80E-01 | 4.00E-02, 1.57E-01 | 0.00E+00     | 4.60E-03, 8.03E-02 | 0.00E+00, 4.20E-02 |
| NA      | 64  | 30  | 1.56E-01    | 7.02E-02, 2.68E-01 | 9.60E-02, 2.45E-01 | 3.10E-02     | 1.08E-02, 1.30E-01 | 1.00E-02, 9.00E-02 |
| NA      | 65  | 17  | 6.20E-02    | 2.65E-02, 1.45E-01 | 2.80E-02, 1.30E-01 | 0.00E+00     | 3.03E-03, 6.15E-02 | 0.00E+00, 4.00E-02 |
| 4408    | 73  | 5   | 4.10E-02    | 2.51E-03, 4.02E-02 | 1.70E-02, 9.80E-02 | 2.70E-02     | 1.41E-04, 1.31E-02 | 9.00E-03, 7.90E-02 |
| NA      | 77  | 16  | 3.90E-02    | 1.88E-02, 1.12E-01 | 1.60E-02, 9.40E-02 | 0.00E+00     | 1.89E-03, 4.58E-02 | 0.00E+00, 3.40E-02 |
| NA      | 77  | 21  | 0.00E+00    | 2.98E-02, 1.49E-01 | 0.00E+00, 3.40E-02 | 0.00E+00     | 3.41E-03, 6.41E-02 | 0.00E+00, 3.40E-02 |
| 4404    | 80  | 14  | 3.80E-02    | 1.42E-02, 9.52E-02 | 1.50E-02, 9.00E-02 | 0.00E+00     | 1.33E-03, 3.73E-02 | 0.00E+00, 3.30E-02 |
| NA      | 82  | 20  | 8.50E-02    | 2.53E-02, 1.32E-01 | 4.70E-02, 1.50E-01 | 4.90E-02     | 2.70E-03, 5.57E-02 | 2.20E-02, 1.04E-01 |
| NA      | 83  | 30  | 7.20E-02    | 4.79E-02, 2.00E-01 | 3.80E-02, 1.34E-01 | 1.20E-02     | 6.32E-03, 9.20E-02 | 3.00E-03, 5.20E-02 |
| NA      | 85  | 32  | 1.18E-01    | 5.15E-02, 2.08E-01 | 7.20E-02, 1.87E-01 | 1.20E-02     | 6.94E-03, 9.64E-02 | 3.00E-03, 5.10E-02 |
| NA      | 88  | 38  | 0.00E+00    | 6.41E-02, 2.41E-01 | 0.00E+00, 3.00E-02 | 0.00E+00     | 9.42E-03, 1.16E-01 | 0.00E+00, 3.00E-02 |
| 4402    | 89  | 6   | 3.40E-02    | 2.68E-03, 3.77E-02 | 1.40E-02, 8.10E-02 | 1.10E-02     | 1.55E-04, 1.23E-02 | 3.00E-03, 4.90E-02 |
| NA      | 92  | 23  | 6.50E-02    | 2.67E-02, 1.34E-01 | 3.40E-02, 1.21E-01 | 0.00E+00     | 2.86E-03, 5.71E-02 | 0.00E+00, 2.90E-02 |
| NA      | 93  | 65  | 3.20E-02    | 1.48E-01, 4.18E-01 | 1.30E-02, 7.80E-02 | 1.10E-02     | 2.95E-02, 2.29E-01 | 2.00E-03, 4.70E-02 |
| 4407    | 94  | 3   | 0.00E+00    | 6.70E-04, 2.05E-02 | 0.00E+00, 2.80E-02 | 0.00E+00     | 2.56E-05, 5.64E-03 | 0.00E+00, 2.80E-02 |

Continued on next page

Table C-continued from previous page

| Village | $n$ | $Z$ | Prop <sub>8k</sub> | 95% PI <sub>8k</sub> | 95% CI <sub>8k</sub> | Prop <sub>30k</sub> | 95% PI <sub>30k</sub> | 95% CI <sub>30k</sub> |
|---------|-----|-----|--------------------|----------------------|----------------------|---------------------|-----------------------|-----------------------|
| NA      | 96  | 34  | 5.20E-02           | 4.69E-02, 1.93E-01   | 2.60E-02, 1.03E-01   | 2.10E-02            | 6.07E-03, 8.90E-02    | 7.00E-03, 6.10E-02    |
| NA      | 100 | 31  | 1.20E-01           | 3.83E-02, 1.66E-01   | 7.60E-02, 1.84E-01   | 3.00E-02            | 4.69E-03, 7.49E-02    | 1.20E-02, 7.30E-02    |
| NA      | 109 | 24  | 9.20E-02           | 2.23E-02, 1.16E-01   | 5.60E-02, 1.48E-01   | 9.00E-03            | 2.31E-03, 4.78E-02    | 2.00E-03, 4.00E-02    |
| NA      | 109 | 51  | 0.00E+00           | 7.52E-02, 2.60E-01   | 0.00E+00, 2.40E-02   | 0.00E+00            | 1.12E-02, 1.28E-01    | 0.00E+00, 2.40E-02    |
| 4401    | 111 | 28  | 7.20E-02           | 2.79E-02, 1.33E-01   | 4.10E-02, 1.23E-01   | 2.70E-02            | 3.10E-03, 5.70E-02    | 1.10E-02, 6.60E-02    |
| NA      | 118 | 51  | 0.00E+00           | 6.64E-02, 2.37E-01   | 0.00E+00, 2.20E-02   | 0.00E+00            | 9.69E-03, 1.15E-01    | 0.00E+00, 2.20E-02    |
| NA      | 119 | 35  | 7.60E-02           | 3.62E-02, 1.56E-01   | 4.50E-02, 1.26E-01   | 8.00E-03            | 4.27E-03, 6.89E-02    | 2.00E-03, 3.70E-02    |
| NA      | 121 | 49  | 8.00E-03           | 6.01E-02, 2.21E-01   | 2.00E-03, 3.60E-02   | 0.00E+00            | 8.43E-03, 1.05E-01    | 0.00E+00, 2.20E-02    |
| NA      | 121 | 82  | 0.00E+00           | 1.43E-01, 4.01E-01   | 0.00E+00, 2.20E-02   | 0.00E+00            | 2.75E-02, 2.16E-01    | 0.00E+00, 2.20E-02    |
| NA      | 124 | 35  | 7.30E-02           | 3.39E-02, 1.48E-01   | 4.30E-02, 1.21E-01   | 4.00E-02            | 3.96E-03, 6.57E-02    | 2.00E-02, 8.10E-02    |
| 4406    | 125 | 15  | 4.00E-02           | 8.52E-03, 6.10E-02   | 2.00E-02, 8.00E-02   | 0.00E+00            | 6.57E-04, 2.25E-02    | 0.00E+00, 2.10E-02    |
| NA      | 125 | 24  | 1.04E-01           | 1.85E-02, 9.89E-02   | 6.70E-02, 1.58E-01   | 5.60E-02            | 1.80E-03, 4.02E-02    | 3.10E-02, 1.00E-01    |
| 4405    | 130 | 10  | 8.00E-03           | 4.02E-03, 3.92E-02   | 2.00E-03, 3.40E-02   | 0.00E+00            | 2.48E-04, 1.31E-02    | 0.00E+00, 2.00E-02    |
| NA      | 132 | 31  | 7.60E-02           | 2.55E-02, 1.22E-01   | 4.60E-02, 1.23E-01   | 2.30E-02            | 2.67E-03, 5.16E-02    | 9.00E-03, 5.60E-02    |
| NA      | 137 | 32  | 5.80E-02           | 2.55E-02, 1.21E-01   | 3.30E-02, 1.01E-01   | 0.00E+00            | 2.70E-03, 5.10E-02    | 0.00E+00, 1.90E-02    |
| 4403    | 140 | 2   | 0.00E+00           | 1.81E-04, 9.84E-03   | 0.00E+00, 1.90E-02   | 0.00E+00            | 4.57E-06, 2.41E-03    | 0.00E+00, 1.90E-02    |
| NA      | 140 | 27  | 4.30E-02           | 1.89E-02, 9.78E-02   | 2.20E-02, 8.10E-02   | 1.40E-02            | 1.84E-03, 4.01E-02    | 5.00E-03, 4.20E-02    |
| NA      | 154 | 27  | 1.90E-02           | 1.63E-02, 8.78E-02   | 8.00E-03, 4.80E-02   | 0.00E+00            | 1.54E-03, 3.52E-02    | 0.00E+00, 1.70E-02    |
| NA      | 156 | 47  | 8.30E-02           | 3.85E-02, 1.58E-01   | 5.40E-02, 1.27E-01   | 2.60E-02            | 4.64E-03, 7.06E-02    | 1.20E-02, 5.60E-02    |
| NA      | 158 | 39  | 1.01E-01           | 2.81E-02, 1.27E-01   | 6.80E-02, 1.48E-01   | 3.80E-02            | 3.10E-03, 5.43E-02    | 2.00E-02, 7.20E-02    |
| NA      | 172 | 47  | 7.60E-02           | 3.37E-02, 1.41E-01   | 4.90E-02, 1.16E-01   | 2.30E-02            | 3.82E-03, 6.22E-02    | 1.00E-02, 5.10E-02    |
| NA      | 178 | 51  | 1.29E-01           | 3.60E-02, 1.48E-01   | 9.30E-02, 1.76E-01   | 4.50E-02            | 4.20E-03, 6.56E-02    | 2.60E-02, 7.80E-02    |
| NA      | 180 | 18  | 2.80E-02           | 6.86E-03, 4.85E-02   | 1.40E-02, 5.60E-02   | 6.00E-03            | 4.92E-04, 1.72E-02    | 1.00E-03, 2.50E-02    |
| NA      | 180 | 23  | 4.40E-02           | 1.03E-02, 6.21E-02   | 2.50E-02, 7.70E-02   | 2.20E-02            | 8.24E-04, 2.34E-02    | 1.00E-02, 4.90E-02    |
| NA      | 192 | 56  | 1.41E-01           | 3.73E-02, 1.50E-01   | 1.04E-01, 1.87E-01   | 3.60E-02            | 4.45E-03, 6.72E-02    | 2.00E-02, 6.60E-02    |
| NA      | 234 | 48  | 3.80E-02           | 2.22E-02, 1.01E-01   | 2.30E-02, 6.50E-02   | 1.70E-02            | 2.15E-03, 4.23E-02    | 8.00E-03, 3.80E-02    |
| NA      | 443 | 277 | 9.00E-03           | 1.29E-01, 3.57E-01   | 4.00E-03, 2.00E-02   | 5.00E-03            | 2.39E-02, 1.91E-01    | 1.00E-03, 1.40E-02    |

# Gabon

**Table D:** Model-based 95% prediction intervals (PI) for  $T$ , the proportion of individuals with parasite counts greater than 8000/ml blood the proportion of individuals with parasite counts greater than 30000/ml blood as well as the 95% confidence intervals for the true proportions based on the binomial sampling distribution of the observed numbers in each village.  $n$ , the number of individuals tested,  $Z$ , the number of individuals tested positive for *Loa Loa*,  $Prop_{8k}$  is the observed proportion with infection levels greater than 8000mf/ml blood,  $Prop_{30k}$  is the observed proportion with infection levels greater than 30000mf/ml blood

| Village | $n$ | $Z$ | $Prop_{8k}$ | 95% $PI_{8k}$      | 95% $CI_{8k}$      | $Prop_{30k}$ | 95% $PI_{30k}$     | 95% $CI_{30k}$     |
|---------|-----|-----|-------------|--------------------|--------------------|--------------|--------------------|--------------------|
| 9035    | 5   | 1   | 0.00E+00    | 1.45E-03, 1.83E-01 | 0.00E+00, 3.51E-01 | 0.00E+00     | 9.65E-05, 7.19E-02 | 0.00E+00, 3.51E-01 |
| 6268    | 8   | 1   | 0.00E+00    | 9.88E-04, 1.24E-01 | 0.00E+00, 2.53E-01 | 0.00E+00     | 5.84E-05, 4.49E-02 | 0.00E+00, 2.53E-01 |
| 9067    | 9   | 3   | 1.11E-01    | 1.21E-02, 2.35E-01 | 2.50E-02, 3.77E-01 | 1.11E-01     | 1.31E-03, 1.00E-01 | 2.50E-02, 3.77E-01 |
| 9044    | 11  | 4   | 1.82E-01    | 1.84E-02, 2.45E-01 | 6.20E-02, 4.27E-01 | 0.00E+00     | 2.30E-03, 1.08E-01 | 0.00E+00, 1.97E-01 |
| 9065    | 13  | 1   | 0.00E+00    | 6.55E-04, 7.97E-02 | 0.00E+00, 1.72E-01 | 0.00E+00     | 3.24E-05, 2.66E-02 | 0.00E+00, 1.72E-01 |
| 6228    | 13  | 3   | 0.00E+00    | 7.63E-03, 1.65E-01 | 0.00E+00, 1.72E-01 | 0.00E+00     | 7.38E-04, 6.57E-02 | 0.00E+00, 1.72E-01 |
| 9047    | 13  | 3   | 0.00E+00    | 7.56E-03, 1.66E-01 | 0.00E+00, 1.72E-01 | 0.00E+00     | 7.41E-04, 6.64E-02 | 0.00E+00, 1.72E-01 |
| 9075    | 14  | 2   | 0.00E+00    | 2.72E-03, 1.14E-01 | 0.00E+00, 1.62E-01 | 0.00E+00     | 1.97E-04, 4.13E-02 | 0.00E+00, 1.62E-01 |
| 9059    | 16  | 1   | 0.00E+00    | 5.65E-04, 6.63E-02 | 0.00E+00, 1.45E-01 | 0.00E+00     | 2.55E-05, 2.16E-02 | 0.00E+00, 1.45E-01 |
| 9108    | 18  | 9   | 3.33E-01    | 5.45E-02, 3.11E-01 | 1.83E-01, 5.27E-01 | 1.11E-01     | 8.31E-03, 1.50E-01 | 3.70E-02, 2.86E-01 |
| 9028    | 18  | 13  | 5.60E-02    | 1.15E-01, 4.48E-01 | 1.20E-02, 2.15E-01 | 0.00E+00     | 2.23E-02, 2.44E-01 | 0.00E+00, 1.31E-01 |
| 9020    | 20  | 0   | 0.00E+00    | 5.13E-05, 2.73E-02 | 0.00E+00, 1.19E-01 | 0.00E+00     | 9.74E-07, 7.19E-03 | 0.00E+00, 1.19E-01 |
| 6252    | 20  | 3   | 5.00E-02    | 4.56E-03, 1.07E-01 | 1.10E-02, 1.96E-01 | 0.00E+00     | 3.67E-04, 3.90E-02 | 0.00E+00, 1.19E-01 |
| 6271    | 20  | 4   | 5.00E-02    | 8.35E-03, 1.34E-01 | 1.10E-02, 1.96E-01 | 0.00E+00     | 8.16E-04, 5.30E-02 | 0.00E+00, 1.19E-01 |
| 6236    | 21  | 1   | 0.00E+00    | 4.36E-04, 5.03E-02 | 0.00E+00, 1.14E-01 | 0.00E+00     | 1.80E-05, 1.53E-02 | 0.00E+00, 1.14E-01 |
| 6266    | 21  | 4   | 0.00E+00    | 7.99E-03, 1.28E-01 | 0.00E+00, 1.14E-01 | 0.00E+00     | 7.29E-04, 4.97E-02 | 0.00E+00, 1.14E-01 |
| 9041    | 21  | 7   | 0.00E+00    | 2.60E-02, 2.11E-01 | 0.00E+00, 1.14E-01 | 0.00E+00     | 3.22E-03, 9.16E-02 | 0.00E+00, 1.14E-01 |
| 9102    | 23  | 8   | 2.17E-01    | 2.98E-02, 2.16E-01 | 1.10E-01, 3.84E-01 | 1.30E-01     | 3.69E-03, 9.58E-02 | 5.30E-02, 2.85E-01 |
| 9036    | 24  | 6   | 4.20E-02    | 1.58E-02, 1.59E-01 | 9.00E-03, 1.67E-01 | 0.00E+00     | 1.72E-03, 6.51E-02 | 0.00E+00, 1.01E-01 |
| 9009    | 25  | 1   | 0.00E+00    | 3.74E-04, 4.23E-02 | 0.00E+00, 9.80E-02 | 0.00E+00     | 1.46E-05, 1.27E-02 | 0.00E+00, 9.80E-02 |
| 9027    | 25  | 6   | 8.00E-02    | 1.51E-02, 1.53E-01 | 2.70E-02, 2.15E-01 | 0.00E+00     | 1.55E-03, 6.15E-02 | 0.00E+00, 9.80E-02 |
| 6221    | 26  | 9   | 1.54E-01    | 3.13E-02, 2.12E-01 | 7.10E-02, 3.02E-01 | 7.70E-02     | 4.07E-03, 9.41E-02 | 2.60E-02, 2.08E-01 |

Continued on next page



Table D—continued from previous page

| Village | $n$ | $Z$ | Props <sub><math>k</math></sub> | 95% PI <sub><math>8k</math></sub> | 95% CI <sub><math>8k</math></sub> | Prop <sub><math>30k</math></sub> | 95% PI <sub><math>30k</math></sub> | 95% CI <sub><math>30k</math></sub> |
|---------|-----|-----|---------------------------------|-----------------------------------|-----------------------------------|----------------------------------|------------------------------------|------------------------------------|
| 9086    | 28  | 3   | 7.10E-02                        | 3.02E-03, 7.57E-02                | 2.40E-02, 1.94E-01                | 3.60E-02                         | 2.11E-04, 2.63E-02                 | 8.00E-03, 1.45E-01                 |
| 6248    | 28  | 6   | 7.10E-02                        | 1.29E-02, 1.35E-01                | 2.40E-02, 1.94E-01                | 0.00E+00                         | 1.29E-03, 5.36E-02                 | 0.00E+00, 8.80E-02                 |
| 9006    | 28  | 7   | 3.60E-02                        | 1.74E-02, 1.55E-01                | 8.00E-03, 1.45E-01                | 0.00E+00                         | 1.87E-03, 6.38E-02                 | 0.00E+00, 8.80E-02                 |
| 9050    | 28  | 7   | 3.60E-02                        | 1.73E-02, 1.56E-01                | 8.00E-03, 1.45E-01                | 0.00E+00                         | 1.91E-03, 6.39E-02                 | 0.00E+00, 8.80E-02                 |
| 9043    | 29  | 7   | 3.40E-02                        | 1.63E-02, 1.50E-01                | 8.00E-03, 1.41E-01                | 0.00E+00                         | 1.77E-03, 6.11E-02                 | 0.00E+00, 8.50E-02                 |
| 9071    | 29  | 7   | 3.40E-02                        | 1.67E-02, 1.49E-01                | 8.00E-03, 1.41E-01                | 0.00E+00                         | 1.77E-03, 6.12E-02                 | 0.00E+00, 8.50E-02                 |
| 9040    | 30  | 6   | 3.30E-02                        | 1.16E-02, 1.25E-01                | 7.00E-03, 1.36E-01                | 0.00E+00                         | 1.13E-03, 4.93E-02                 | 0.00E+00, 8.30E-02                 |
| 9024    | 30  | 8   | 0.00E+00                        | 2.06E-02, 1.62E-01                | 0.00E+00, 8.30E-02                | 0.00E+00                         | 2.31E-03, 6.85E-02                 | 0.00E+00, 8.30E-02                 |
| 9063    | 31  | 0   | 0.00E+00                        | 4.03E-05, 1.86E-02                | 0.00E+00, 8.00E-02                | 0.00E+00                         | 6.83E-07, 4.49E-03                 | 0.00E+00, 8.00E-02                 |
| 6234    | 32  | 7   | 0.00E+00                        | 1.45E-02, 1.35E-01                | 0.00E+00, 7.80E-02                | 0.00E+00                         | 1.48E-03, 5.40E-02                 | 0.00E+00, 7.80E-02                 |
| 9017    | 32  | 8   | 3.10E-02                        | 1.88E-02, 1.51E-01                | 7.00E-03, 1.29E-01                | 3.10E-02                         | 2.09E-03, 6.28E-02                 | 7.00E-03, 1.29E-01                 |
| 9037    | 32  | 9   | 6.20E-02                        | 2.38E-02, 1.69E-01                | 2.10E-02, 1.72E-01                | 3.10E-02                         | 2.73E-03, 7.20E-02                 | 7.00E-03, 1.29E-01                 |
| 6220    | 34  | 7   | 5.90E-02                        | 1.33E-02, 1.26E-01                | 2.00E-02, 1.63E-01                | 2.90E-02                         | 1.34E-03, 5.03E-02                 | 7.00E-03, 1.22E-01                 |
| 9077    | 34  | 8   | 0.00E+00                        | 1.71E-02, 1.42E-01                | 0.00E+00, 7.40E-02                | 0.00E+00                         | 1.80E-03, 5.81E-02                 | 0.00E+00, 7.40E-02                 |
| 6219    | 34  | 9   | 5.90E-02                        | 2.16E-02, 1.58E-01                | 2.00E-02, 1.63E-01                | 2.90E-02                         | 2.42E-03, 6.63E-02                 | 7.00E-03, 1.22E-01                 |
| 9042    | 35  | 2   | 0.00E+00                        | 9.50E-04, 4.49E-02                | 0.00E+00, 7.20E-02                | 0.00E+00                         | 4.85E-05, 1.39E-02                 | 0.00E+00, 7.20E-02                 |
| 9076    | 36  | 3   | 0.00E+00                        | 2.20E-03, 5.81E-02                | 0.00E+00, 7.00E-02                | 0.00E+00                         | 1.36E-04, 1.90E-02                 | 0.00E+00, 7.00E-02                 |
| 9070    | 36  | 10  | 2.80E-02                        | 2.41E-02, 1.65E-01                | 6.00E-03, 1.15E-01                | 0.00E+00                         | 2.77E-03, 6.96E-02                 | 0.00E+00, 7.00E-02                 |
| 9068    | 37  | 1   | 0.00E+00                        | 2.56E-04, 2.82E-02                | 0.00E+00, 6.80E-02                | 0.00E+00                         | 8.37E-06, 7.92E-03                 | 0.00E+00, 6.80E-02                 |
| 9084    | 37  | 1   | 0.00E+00                        | 2.57E-04, 2.83E-02                | 0.00E+00, 6.80E-02                | 0.00E+00                         | 8.05E-06, 8.03E-03                 | 0.00E+00, 6.80E-02                 |
| 6270    | 37  | 7   | 0.00E+00                        | 1.19E-02, 1.15E-01                | 0.00E+00, 6.80E-02                | 0.00E+00                         | 1.13E-03, 4.47E-02                 | 0.00E+00, 6.80E-02                 |
| 9030    | 37  | 13  | 1.08E-01                        | 3.75E-02, 2.07E-01                | 4.90E-02, 2.20E-01                | 5.40E-02                         | 4.86E-03, 9.31E-02                 | 1.80E-02, 1.51E-01                 |
| 9008    | 38  | 0   | 0.00E+00                        | 3.59E-05, 1.50E-02                | 0.00E+00, 6.60E-02                | 0.00E+00                         | 5.27E-07, 3.62E-03                 | 0.00E+00, 6.60E-02                 |
| 9104    | 38  | 12  | 2.60E-02                        | 3.14E-02, 1.85E-01                | 6.00E-03, 1.10E-01                | 0.00E+00                         | 3.84E-03, 8.16E-02                 | 0.00E+00, 6.60E-02                 |
| 9057    | 38  | 14  | 0.00E+00                        | 4.17E-02, 2.16E-01                | 0.00E+00, 6.60E-02                | 0.00E+00                         | 5.46E-03, 9.83E-02                 | 0.00E+00, 6.60E-02                 |
| 9069    | 39  | 1   | 0.00E+00                        | 2.46E-04, 2.71E-02                | 0.00E+00, 6.50E-02                | 0.00E+00                         | 7.65E-06, 7.45E-03                 | 0.00E+00, 6.50E-02                 |
| 9045    | 39  | 11  | 7.70E-02                        | 2.57E-02, 1.66E-01                | 3.10E-02, 1.78E-01                | 0.00E+00                         | 3.04E-03, 7.13E-02                 | 0.00E+00, 6.50E-02                 |
| 9038    | 40  | 15  | 1.00E-01                        | 4.32E-02, 2.20E-01                | 4.60E-02, 2.05E-01                | 0.00E+00                         | 5.79E-03, 1.00E-01                 | 0.00E+00, 6.30E-02                 |

Continued on next page

Table D—continued from previous page

| Village | $n$ | $Z$ | Props <sub><math>k</math></sub> | 95% PI <sub><math>8k</math></sub> | 95% CI <sub><math>8k</math></sub> | Prop <sub><math>30k</math></sub> | 95% PI <sub><math>30k</math></sub> | 95% CI <sub><math>30k</math></sub> |
|---------|-----|-----|---------------------------------|-----------------------------------|-----------------------------------|----------------------------------|------------------------------------|------------------------------------|
| 9011    | 41  | 1   | 0.00E+00                        | 2.28E-04, 2.56E-02                | 0.00E+00, 6.20E-02                | 0.00E+00                         | 7.28E-06, 7.06E-03                 | 0.00E+00, 6.20E-02                 |
| 6255    | 41  | 15  | 4.90E-02                        | 4.14E-02, 2.13E-01                | 1.60E-02, 1.37E-01                | 0.00E+00                         | 5.50E-03, 9.72E-02                 | 0.00E+00, 6.20E-02                 |
| 9026    | 41  | 22  | 2.40E-02                        | 8.24E-02, 3.18E-01                | 5.00E-03, 1.02E-01                | 0.00E+00                         | 1.34E-02, 1.58E-01                 | 0.00E+00, 6.20E-02                 |
| 6263    | 42  | 6   | 4.80E-02                        | 7.46E-03, 8.69E-02                | 1.60E-02, 1.34E-01                | 0.00E+00                         | 6.21E-04, 3.23E-02                 | 0.00E+00, 6.10E-02                 |
| 9014    | 42  | 9   | 2.40E-02                        | 1.59E-02, 1.26E-01                | 5.00E-03, 1.00E-01                | 0.00E+00                         | 1.62E-03, 5.10E-02                 | 0.00E+00, 6.10E-02                 |
| 9064    | 42  | 11  | 0.00E+00                        | 2.31E-02, 1.53E-01                | 0.00E+00, 6.10E-02                | 0.00E+00                         | 2.60E-03, 6.40E-02                 | 0.00E+00, 6.10E-02                 |
| 9007    | 42  | 12  | 0.00E+00                        | 2.74E-02, 1.66E-01                | 0.00E+00, 6.10E-02                | 0.00E+00                         | 3.09E-03, 7.16E-02                 | 0.00E+00, 6.10E-02                 |
| 6214    | 43  | 2   | 2.30E-02                        | 7.55E-04, 3.58E-02                | 5.00E-03, 9.80E-02                | 0.00E+00                         | 3.48E-05, 1.08E-02                 | 0.00E+00, 5.90E-02                 |
| 9049    | 43  | 5   | 0.00E+00                        | 4.98E-03, 7.22E-02                | 0.00E+00, 5.90E-02                | 0.00E+00                         | 3.78E-04, 2.59E-02                 | 0.00E+00, 5.90E-02                 |
| 9021    | 43  | 16  | 4.70E-02                        | 4.40E-02, 2.15E-01                | 1.60E-02, 1.31E-01                | 0.00E+00                         | 5.80E-03, 9.82E-02                 | 0.00E+00, 5.90E-02                 |
| 9003    | 44  | 2   | 0.00E+00                        | 7.40E-04, 3.51E-02                | 0.00E+00, 5.80E-02                | 0.00E+00                         | 3.41E-05, 1.06E-02                 | 0.00E+00, 5.80E-02                 |
| 9113    | 44  | 15  | 9.10E-02                        | 3.76E-02, 1.98E-01                | 4.10E-02, 1.88E-01                | 2.30E-02                         | 4.82E-03, 8.87E-02                 | 5.00E-03, 9.60E-02                 |
| 9099    | 45  | 15  | 8.90E-02                        | 3.67E-02, 1.92E-01                | 4.10E-02, 1.84E-01                | 2.20E-02                         | 4.62E-03, 8.62E-02                 | 5.00E-03, 9.40E-02                 |
| 9001    | 46  | 0   | 0.00E+00                        | 3.22E-05, 1.27E-02                | 0.00E+00, 5.60E-02                | 0.00E+00                         | 4.69E-07, 2.92E-03                 | 0.00E+00, 5.60E-02                 |
| 9098    | 46  | 12  | 2.20E-02                        | 2.39E-02, 1.50E-01                | 5.00E-03, 9.20E-02                | 2.20E-02                         | 2.71E-03, 6.34E-02                 | 5.00E-03, 9.20E-02                 |
| 6210    | 46  | 14  | 0.00E+00                        | 3.13E-02, 1.75E-01                | 0.00E+00, 5.60E-02                | 0.00E+00                         | 3.80E-03, 7.71E-02                 | 0.00E+00, 5.60E-02                 |
| 9016    | 47  | 0   | 0.00E+00                        | 3.13E-05, 1.24E-02                | 0.00E+00, 5.40E-02                | 0.00E+00                         | 4.50E-07, 2.86E-03                 | 0.00E+00, 5.40E-02                 |
| 9029    | 47  | 0   | 0.00E+00                        | 3.18E-05, 1.24E-02                | 0.00E+00, 5.40E-02                | 0.00E+00                         | 4.72E-07, 2.91E-03                 | 0.00E+00, 5.40E-02                 |
| 9056    | 48  | 2   | 2.10E-02                        | 6.85E-04, 3.21E-02                | 5.00E-03, 8.80E-02                | 2.10E-02                         | 2.94E-05, 9.47E-03                 | 5.00E-03, 8.80E-02                 |
| 6216    | 48  | 5   | 0.00E+00                        | 4.33E-03, 6.42E-02                | 0.00E+00, 5.30E-02                | 0.00E+00                         | 3.06E-04, 2.25E-02                 | 0.00E+00, 5.30E-02                 |
| 9058    | 48  | 20  | 0.00E+00                        | 5.48E-02, 2.42E-01                | 0.00E+00, 5.30E-02                | 0.00E+00                         | 7.76E-03, 1.13E-01                 | 0.00E+00, 5.30E-02                 |
| 9095    | 49  | 11  | 4.10E-02                        | 1.84E-02, 1.28E-01                | 1.40E-02, 1.16E-01                | 2.00E-02                         | 1.94E-03, 5.28E-02                 | 5.00E-03, 8.60E-02                 |
| 9022    | 50  | 0   | 0.00E+00                        | 2.99E-05, 1.16E-02                | 0.00E+00, 5.10E-02                | 0.00E+00                         | 4.49E-07, 2.63E-03                 | 0.00E+00, 5.10E-02                 |
| 9083    | 50  | 1   | 0.00E+00                        | 1.87E-04, 2.08E-02                | 0.00E+00, 5.10E-02                | 0.00E+00                         | 5.46E-06, 5.53E-03                 | 0.00E+00, 5.10E-02                 |
| 9033    | 50  | 8   | 4.00E-02                        | 1.01E-02, 9.29E-02                | 1.30E-02, 1.14E-01                | 2.00E-02                         | 8.90E-04, 3.59E-02                 | 4.00E-03, 8.50E-02                 |
| 9062    | 50  | 15  | 2.00E-02                        | 3.13E-02, 1.71E-01                | 4.00E-03, 8.50E-02                | 0.00E+00                         | 3.78E-03, 7.51E-02                 | 0.00E+00, 5.10E-02                 |
| 6212    | 51  | 12  | 5.90E-02                        | 2.07E-02, 1.34E-01                | 2.40E-02, 1.38E-01                | 0.00E+00                         | 2.18E-03, 5.53E-02                 | 0.00E+00, 5.00E-02                 |
| 6235    | 51  | 16  | 0.00E+00                        | 3.41E-02, 1.79E-01                | 0.00E+00, 5.00E-02                | 0.00E+00                         | 4.24E-03, 7.93E-02                 | 0.00E+00, 5.00E-02                 |

Continued on next page

Table D—continued from previous page

| Village | $n$ | $Z$ | Props <sub><math>k</math></sub> | 95% PI <sub><math>8k</math></sub> | 95% CI <sub><math>8k</math></sub> | Prop <sub><math>30k</math></sub> | 95% PI <sub><math>30k</math></sub> | 95% CI <sub><math>30k</math></sub> |
|---------|-----|-----|---------------------------------|-----------------------------------|-----------------------------------|----------------------------------|------------------------------------|------------------------------------|
| 6247    | 52  | 5   | 0.00E+00                        | 3.89E-03, 5.91E-02                | 0.00E+00, 4.90E-02                | 0.00E+00                         | 2.65E-04, 2.02E-02                 | 0.00E+00, 4.90E-02                 |
| 9051    | 52  | 13  | 7.70E-02                        | 2.29E-02, 1.42E-01                | 3.50E-02, 1.61E-01                | 7.70E-02                         | 2.52E-03, 5.91E-02                 | 3.50E-02, 1.61E-01                 |
| 6239    | 53  | 1   | 0.00E+00                        | 1.80E-04, 1.95E-02                | 0.00E+00, 4.90E-02                | 0.00E+00                         | 4.78E-06, 5.16E-03                 | 0.00E+00, 4.90E-02                 |
| 9082    | 53  | 2   | 0.00E+00                        | 5.99E-04, 2.87E-02                | 0.00E+00, 4.90E-02                | 0.00E+00                         | 2.49E-05, 8.38E-03                 | 0.00E+00, 4.90E-02                 |
| 6260    | 53  | 7   | 5.70E-02                        | 7.33E-03, 7.78E-02                | 2.30E-02, 1.33E-01                | 3.80E-02                         | 5.80E-04, 2.86E-02                 | 1.30E-02, 1.08E-01                 |
| 9093    | 53  | 9   | 0.00E+00                        | 1.17E-02, 9.76E-02                | 0.00E+00, 4.90E-02                | 0.00E+00                         | 1.04E-03, 3.77E-02                 | 0.00E+00, 4.90E-02                 |
| 6229    | 53  | 10  | 7.50E-02                        | 1.40E-02, 1.07E-01                | 3.40E-02, 1.58E-01                | 1.90E-02                         | 1.35E-03, 4.26E-02                 | 4.00E-03, 8.00E-02                 |
| 9073    | 54  | 0   | 0.00E+00                        | 2.89E-05, 1.08E-02                | 0.00E+00, 4.80E-02                | 0.00E+00                         | 3.91E-07, 2.45E-03                 | 0.00E+00, 4.80E-02                 |
| 6208    | 54  | 6   | 3.70E-02                        | 5.18E-03, 6.62E-02                | 1.20E-02, 1.06E-01                | 0.00E+00                         | 3.87E-04, 2.34E-02                 | 0.00E+00, 4.80E-02                 |
| 9087    | 55  | 1   | 0.00E+00                        | 1.69E-04, 1.87E-02                | 0.00E+00, 4.70E-02                | 0.00E+00                         | 4.64E-06, 4.91E-03                 | 0.00E+00, 4.70E-02                 |
| 9004    | 55  | 11  | 3.60E-02                        | 1.60E-02, 1.13E-01                | 1.20E-02, 1.04E-01                | 0.00E+00                         | 1.56E-03, 4.51E-02                 | 0.00E+00, 4.70E-02                 |
| 6237    | 55  | 17  | 9.10E-02                        | 3.40E-02, 1.74E-01                | 4.50E-02, 1.75E-01                | 0.00E+00                         | 4.10E-03, 7.71E-02                 | 0.00E+00, 4.70E-02                 |
| 9107    | 55  | 19  | 7.30E-02                        | 4.05E-02, 1.96E-01                | 3.30E-02, 1.52E-01                | 1.80E-02                         | 5.25E-03, 8.82E-02                 | 4.00E-03, 7.70E-02                 |
| 6240    | 56  | 6   | 3.60E-02                        | 5.01E-03, 6.30E-02                | 1.20E-02, 1.02E-01                | 0.00E+00                         | 3.66E-04, 2.22E-02                 | 0.00E+00, 4.60E-02                 |
| 9012    | 56  | 8   | 0.00E+00                        | 8.65E-03, 8.23E-02                | 0.00E+00, 4.60E-02                | 0.00E+00                         | 7.25E-04, 3.09E-02                 | 0.00E+00, 4.60E-02                 |
| 9111    | 56  | 14  | 1.80E-02                        | 2.36E-02, 1.41E-01                | 4.00E-03, 7.60E-02                | 1.80E-02                         | 2.59E-03, 5.98E-02                 | 4.00E-03, 7.60E-02                 |
| 9066    | 57  | 1   | 0.00E+00                        | 1.64E-04, 1.81E-02                | 0.00E+00, 4.50E-02                | 0.00E+00                         | 4.45E-06, 4.73E-03                 | 0.00E+00, 4.50E-02                 |
| 6246    | 57  | 4   | 1.80E-02                        | 2.24E-03, 4.40E-02                | 4.00E-03, 7.50E-02                | 1.80E-02                         | 1.31E-04, 1.44E-02                 | 4.00E-03, 7.50E-02                 |
| 6226    | 57  | 8   | 3.50E-02                        | 8.51E-03, 8.08E-02                | 1.20E-02, 1.01E-01                | 1.80E-02                         | 7.07E-04, 3.01E-02                 | 4.00E-03, 7.50E-02                 |
| 6217    | 57  | 15  | 1.93E-01                        | 2.60E-02, 1.47E-01                | 1.22E-01, 2.92E-01                | 1.05E-01                         | 2.92E-03, 6.31E-02                 | 5.50E-02, 1.91E-01                 |
| 9089    | 57  | 17  | 7.00E-02                        | 3.21E-02, 1.67E-01                | 3.20E-02, 1.47E-01                | 1.80E-02                         | 3.90E-03, 7.36E-02                 | 4.00E-03, 7.50E-02                 |
| 6241    | 59  | 9   | 5.10E-02                        | 1.01E-02, 8.66E-02                | 2.10E-02, 1.21E-01                | 0.00E+00                         | 8.70E-04, 3.29E-02                 | 0.00E+00, 4.40E-02                 |
| 9023    | 59  | 11  | 1.70E-02                        | 1.42E-02, 1.05E-01                | 4.00E-03, 7.20E-02                | 0.00E+00                         | 1.36E-03, 4.17E-02                 | 0.00E+00, 4.40E-02                 |
| 9053    | 59  | 14  | 6.80E-02                        | 2.21E-02, 1.33E-01                | 3.10E-02, 1.43E-01                | 3.40E-02                         | 2.33E-03, 5.52E-02                 | 1.10E-02, 9.70E-02                 |
| 6267    | 59  | 17  | 1.70E-02                        | 3.06E-02, 1.62E-01                | 4.00E-03, 7.20E-02                | 0.00E+00                         | 3.56E-03, 6.99E-02                 | 0.00E+00, 4.40E-02                 |
| 9005    | 60  | 2   | 0.00E+00                        | 5.28E-04, 2.49E-02                | 0.00E+00, 4.30E-02                | 0.00E+00                         | 1.97E-05, 7.14E-03                 | 0.00E+00, 4.30E-02                 |
| 9019    | 60  | 2   | 0.00E+00                        | 5.23E-04, 2.50E-02                | 0.00E+00, 4.30E-02                | 0.00E+00                         | 1.98E-05, 7.06E-03                 | 0.00E+00, 4.30E-02                 |
| 9025    | 60  | 2   | 1.70E-02                        | 5.18E-04, 2.54E-02                | 4.00E-03, 7.10E-02                | 0.00E+00                         | 2.04E-05, 7.15E-03                 | 0.00E+00, 4.30E-02                 |

Continued on next page

Table D—continued from previous page

| Village | $n$ | $Z$ | Prop <sub>sk</sub> | 95% PI <sub>sk</sub> | 95% CI <sub>sk</sub> | Prop <sub>30k</sub> | 95% PI <sub>30k</sub> | 95% CI <sub>30k</sub> |
|---------|-----|-----|--------------------|----------------------|----------------------|---------------------|-----------------------|-----------------------|
| 6243    | 60  | 9   | 3.30E-02           | 9.74E-03, 8.56E-02   | 1.10E-02, 9.60E-02   | 0.00E+00            | 8.62E-04, 3.20E-02    | 0.00E+00, 4.30E-02    |
| 9055    | 60  | 11  | 0.00E+00           | 1.41E-02, 1.03E-01   | 0.00E+00, 4.30E-02   | 0.00E+00            | 1.33E-03, 4.08E-02    | 0.00E+00, 4.30E-02    |
| 9081    | 60  | 15  | 6.70E-02           | 2.41E-02, 1.40E-01   | 3.00E-02, 1.40E-01   | 1.70E-02            | 2.70E-03, 5.93E-02    | 4.00E-03, 7.10E-02    |
| 6223    | 60  | 17  | 8.30E-02           | 2.95E-02, 1.59E-01   | 4.10E-02, 1.61E-01   | 3.30E-02            | 3.43E-03, 6.84E-02    | 1.10E-02, 9.60E-02    |
| 9060    | 61  | 2   | 0.00E+00           | 5.02E-04, 2.48E-02   | 0.00E+00, 4.20E-02   | 0.00E+00            | 1.95E-05, 6.93E-03    | 0.00E+00, 4.20E-02    |
| 9031    | 61  | 3   | 0.00E+00           | 1.16E-03, 3.30E-02   | 0.00E+00, 4.20E-02   | 0.00E+00            | 5.36E-05, 9.84E-03    | 0.00E+00, 4.20E-02    |
| 9061    | 61  | 3   | 0.00E+00           | 1.15E-03, 3.29E-02   | 0.00E+00, 4.20E-02   | 0.00E+00            | 5.54E-05, 9.90E-03    | 0.00E+00, 4.20E-02    |
| 6206    | 61  | 10  | 3.30E-02           | 1.16E-02, 9.22E-02   | 1.10E-02, 9.40E-02   | 1.60E-02            | 1.04E-03, 3.57E-02    | 4.00E-03, 7.00E-02    |
| 6249    | 61  | 21  | 9.80E-02           | 4.11E-02, 1.93E-01   | 5.20E-02, 1.79E-01   | 1.60E-02            | 5.28E-03, 8.81E-02    | 4.00E-03, 7.00E-02    |
| 6207    | 62  | 3   | 0.00E+00           | 1.13E-03, 3.21E-02   | 0.00E+00, 4.20E-02   | 0.00E+00            | 5.55E-05, 9.65E-03    | 0.00E+00, 4.20E-02    |
| 9002    | 62  | 5   | 0.00E+00           | 3.07E-03, 4.83E-02   | 0.00E+00, 4.20E-02   | 0.00E+00            | 1.94E-04, 1.61E-02    | 0.00E+00, 4.20E-02    |
| 6261    | 62  | 8   | 1.60E-02           | 7.49E-03, 7.31E-02   | 4.00E-03, 6.90E-02   | 0.00E+00            | 5.76E-04, 2.70E-02    | 0.00E+00, 4.20E-02    |
| 6251    | 62  | 27  | 6.50E-02           | 6.20E-02, 2.48E-01   | 2.90E-02, 1.36E-01   | 3.20E-02            | 9.04E-03, 1.18E-01    | 1.10E-02, 9.30E-02    |
| 6205    | 63  | 1   | 0.00E+00           | 1.51E-04, 1.64E-02   | 0.00E+00, 4.10E-02   | 0.00E+00            | 3.71E-06, 4.16E-03    | 0.00E+00, 4.10E-02    |
| 6204    | 64  | 11  | 6.20E-02           | 1.28E-02, 9.56E-02   | 2.80E-02, 1.32E-01   | 0.00E+00            | 1.16E-03, 3.72E-02    | 0.00E+00, 4.10E-02    |
| 6201    | 64  | 16  | 4.70E-02           | 2.48E-02, 1.38E-01   | 1.90E-02, 1.12E-01   | 3.10E-02            | 2.70E-03, 5.86E-02    | 1.00E-02, 9.00E-02    |
| 9114    | 65  | 10  | 1.50E-02           | 1.07E-02, 8.58E-02   | 3.00E-03, 6.60E-02   | 0.00E+00            | 9.48E-04, 3.29E-02    | 0.00E+00, 4.00E-02    |
| 6256    | 65  | 11  | 3.10E-02           | 1.26E-02, 9.38E-02   | 1.00E-02, 8.90E-02   | 3.10E-02            | 1.14E-03, 3.67E-02    | 1.00E-02, 8.90E-02    |
| 6215    | 66  | 5   | 1.50E-02           | 2.83E-03, 4.49E-02   | 3.00E-03, 6.50E-02   | 0.00E+00            | 1.74E-04, 1.48E-02    | 0.00E+00, 3.90E-02    |
| 6264    | 66  | 13  | 1.50E-02           | 1.64E-02, 1.09E-01   | 3.00E-03, 6.50E-02   | 0.00E+00            | 1.61E-03, 4.39E-02    | 0.00E+00, 3.90E-02    |
| 9088    | 67  | 16  | 4.50E-02           | 2.27E-02, 1.32E-01   | 1.80E-02, 1.07E-01   | 0.00E+00            | 2.46E-03, 5.50E-02    | 0.00E+00, 3.90E-02    |
| 9109    | 67  | 34  | 9.00E-02           | 8.16E-02, 2.91E-01   | 4.70E-02, 1.64E-01   | 1.50E-02            | 1.27E-02, 1.45E-01    | 3.00E-03, 6.40E-02    |
| 6227    | 68  | 11  | 4.40E-02           | 1.18E-02, 8.92E-02   | 1.80E-02, 1.05E-01   | 0.00E+00            | 1.06E-03, 3.46E-02    | 0.00E+00, 3.80E-02    |
| 9046    | 70  | 1   | 0.00E+00           | 1.36E-04, 1.45E-02   | 0.00E+00, 3.70E-02   | 0.00E+00            | 3.21E-06, 3.66E-03    | 0.00E+00, 3.70E-02    |
| 9079    | 70  | 1   | 0.00E+00           | 1.33E-04, 1.46E-02   | 0.00E+00, 3.70E-02   | 0.00E+00            | 3.21E-06, 3.68E-03    | 0.00E+00, 3.70E-02    |
| 9034    | 70  | 2   | 1.40E-02           | 4.38E-04, 2.13E-02   | 3.00E-03, 6.20E-02   | 1.40E-02            | 1.58E-05, 5.86E-03    | 3.00E-03, 6.20E-02    |
| 9096    | 71  | 10  | 1.40E-02           | 9.38E-03, 7.79E-02   | 3.00E-03, 6.10E-02   | 0.00E+00            | 7.82E-04, 2.93E-02    | 0.00E+00, 3.70E-02    |
| 6250    | 71  | 16  | 2.80E-02           | 2.13E-02, 1.24E-01   | 9.00E-03, 8.20E-02   | 0.00E+00            | 2.24E-03, 5.05E-02    | 0.00E+00, 3.70E-02    |

Continued on next page

Table D—continued from previous page

| Village | $n$ | $Z$ | Prop <sub>sk</sub> | 95% PI <sub>8k</sub> | 95% CI <sub>8k</sub> | Prop <sub>30k</sub> | 95% PI <sub>30k</sub> | 95% CI <sub>30k</sub> |
|---------|-----|-----|--------------------|----------------------|----------------------|---------------------|-----------------------|-----------------------|
| 9015    | 72  | 7   | 1.40E-02           | 4.84E-03, 5.49E-02   | 3.00E-03, 6.00E-02   | 0.00E+00            | 3.30E-04, 1.90E-02    | 0.00E+00, 3.60E-02    |
| 9085    | 72  | 28  | 0.00E+00           | 5.28E-02, 2.17E-01   | 0.00E+00, 3.60E-02   | 0.00E+00            | 7.32E-03, 1.01E-01    | 0.00E+00, 3.60E-02    |
| 9032    | 73  | 3   | 2.70E-02           | 9.00E-04, 2.70E-02   | 9.00E-03, 7.90E-02   | 0.00E+00            | 3.97E-05, 7.96E-03    | 0.00E+00, 3.60E-02    |
| 6211    | 73  | 12  | 2.70E-02           | 1.23E-02, 9.00E-02   | 9.00E-03, 7.90E-02   | 2.70E-02            | 1.11E-03, 3.45E-02    | 9.00E-03, 7.90E-02    |
| 9010    | 73  | 12  | 2.70E-02           | 1.25E-02, 9.01E-02   | 9.00E-03, 7.90E-02   | 0.00E+00            | 1.12E-03, 3.50E-02    | 0.00E+00, 3.60E-02    |
| 9105    | 74  | 37  | 9.50E-02           | 8.04E-02, 2.85E-01   | 5.20E-02, 1.66E-01   | 1.40E-02            | 1.28E-02, 1.41E-01    | 3.00E-03, 5.80E-02    |
| 6202    | 75  | 7   | 0.00E+00           | 4.55E-03, 5.27E-02   | 0.00E+00, 3.50E-02   | 0.00E+00            | 3.08E-04, 1.80E-02    | 0.00E+00, 3.50E-02    |
| 9092    | 75  | 8   | 2.70E-02           | 5.80E-03, 5.96E-02   | 9.00E-03, 7.70E-02   | 0.00E+00            | 4.22E-04, 2.10E-02    | 0.00E+00, 3.50E-02    |
| 9097    | 75  | 19  | 9.30E-02           | 2.62E-02, 1.39E-01   | 5.10E-02, 1.64E-01   | 1.30E-02            | 2.91E-03, 5.90E-02    | 3.00E-03, 5.80E-02    |
| 6230    | 77  | 16  | 6.50E-02           | 1.89E-02, 1.13E-01   | 3.20E-02, 1.27E-01   | 1.30E-02            | 1.90E-03, 4.63E-02    | 3.00E-03, 5.60E-02    |
| 9052    | 77  | 21  | 5.20E-02           | 2.97E-02, 1.49E-01   | 2.40E-02, 1.11E-01   | 0.00E+00            | 3.41E-03, 6.41E-02    | 0.00E+00, 3.40E-02    |
| 6254    | 77  | 28  | 1.04E-01           | 4.75E-02, 2.02E-01   | 6.00E-02, 1.75E-01   | 1.30E-02            | 6.28E-03, 9.29E-02    | 3.00E-03, 5.60E-02    |
| 6262    | 78  | 17  | 2.60E-02           | 2.05E-02, 1.18E-01   | 9.00E-03, 7.50E-02   | 0.00E+00            | 2.11E-03, 4.85E-02    | 0.00E+00, 3.40E-02    |
| 9054    | 78  | 17  | 1.30E-02           | 2.07E-02, 1.18E-01   | 3.00E-03, 5.50E-02   | 0.00E+00            | 2.09E-03, 4.84E-02    | 0.00E+00, 3.40E-02    |
| 9080    | 79  | 11  | 1.30E-02           | 9.59E-03, 7.55E-02   | 3.00E-03, 5.50E-02   | 0.00E+00            | 7.78E-04, 2.86E-02    | 0.00E+00, 3.30E-02    |
| 6242    | 80  | 8   | 2.50E-02           | 5.37E-03, 5.54E-02   | 8.00E-03, 7.30E-02   | 0.00E+00            | 3.71E-04, 1.93E-02    | 0.00E+00, 3.30E-02    |
| 6222    | 80  | 9   | 3.80E-02           | 6.55E-03, 6.16E-02   | 1.50E-02, 9.00E-02   | 0.00E+00            | 5.03E-04, 2.21E-02    | 0.00E+00, 3.30E-02    |
| 6209    | 81  | 10  | 0.00E+00           | 7.81E-03, 6.74E-02   | 0.00E+00, 3.20E-02   | 0.00E+00            | 6.09E-04, 2.48E-02    | 0.00E+00, 3.20E-02    |
| 9039    | 81  | 23  | 2.50E-02           | 3.18E-02, 1.55E-01   | 8.00E-03, 7.20E-02   | 1.20E-02            | 3.69E-03, 6.72E-02    | 3.00E-03, 5.30E-02    |
| 9101    | 82  | 19  | 3.70E-02           | 2.30E-02, 1.25E-01   | 1.50E-02, 8.80E-02   | 0.00E+00            | 2.46E-03, 5.21E-02    | 0.00E+00, 3.20E-02    |
| 9074    | 84  | 14  | 2.40E-02           | 1.33E-02, 8.92E-02   | 8.00E-03, 6.90E-02   | 1.20E-02            | 1.19E-03, 3.47E-02    | 3.00E-03, 5.20E-02    |
| 6224    | 84  | 25  | 7.10E-02           | 3.48E-02, 1.62E-01   | 3.70E-02, 1.32E-01   | 2.40E-02            | 4.14E-03, 7.18E-02    | 8.00E-03, 6.90E-02    |
| 9090    | 85  | 23  | 9.40E-02           | 3.00E-02, 1.46E-01   | 5.40E-02, 1.59E-01   | 0.00E+00            | 3.44E-03, 6.35E-02    | 0.00E+00, 3.10E-02    |
| 9103    | 86  | 23  | 7.00E-02           | 2.95E-02, 1.45E-01   | 3.70E-02, 1.29E-01   | 3.50E-02            | 3.32E-03, 6.21E-02    | 1.40E-02, 8.40E-02    |
| 6218    | 87  | 11  | 0.00E+00           | 8.38E-03, 6.76E-02   | 0.00E+00, 3.00E-02   | 0.00E+00            | 6.58E-04, 2.50E-02    | 0.00E+00, 3.00E-02    |
| 9013    | 89  | 0   | 0.00E+00           | 2.06E-05, 6.56E-03   | 0.00E+00, 3.00E-02   | 0.00E+00            | 2.34E-07, 1.36E-03    | 0.00E+00, 3.00E-02    |
| 9100    | 90  | 9   | 1.10E-02           | 5.50E-03, 5.42E-02   | 2.00E-03, 4.80E-02   | 0.00E+00            | 3.96E-04, 1.88E-02    | 0.00E+00, 2.90E-02    |
| 9078    | 91  | 16  | 1.10E-02           | 1.48E-02, 9.34E-02   | 2.00E-03, 4.80E-02   | 0.00E+00            | 1.37E-03, 3.70E-02    | 0.00E+00, 2.90E-02    |

Continued on next page

Table D—continued from previous page

| Village | $n$ | $Z$ | Prop <sub>8k</sub> | 95% PI <sub>8k</sub> | 95% CI <sub>8k</sub> | Prop <sub>30k</sub> | 95% PI <sub>30k</sub> | 95% CI <sub>30k</sub> |
|---------|-----|-----|--------------------|----------------------|----------------------|---------------------|-----------------------|-----------------------|
| 6225    | 92  | 4   | 2.20E-02           | 1.17E-03, 2.59E-02   | 7.00E-03, 6.40E-02   | 1.10E-02            | 5.45E-05, 7.75E-03    | 2.00E-03, 4.70E-02    |
| 6244    | 94  | 16  | 5.30E-02           | 1.43E-02, 9.01E-02   | 2.60E-02, 1.05E-01   | 1.10E-02            | 1.30E-03, 3.52E-02    | 2.00E-03, 4.60E-02    |
| 6273    | 95  | 33  | 9.50E-02           | 4.58E-02, 1.90E-01   | 5.60E-02, 1.56E-01   | 1.10E-02            | 5.88E-03, 8.63E-02    | 2.00E-03, 4.60E-02    |
| 6232    | 98  | 22  | 5.10E-02           | 2.26E-02, 1.19E-01   | 2.50E-02, 1.01E-01   | 0.00E+00            | 2.39E-03, 4.97E-02    | 0.00E+00, 2.70E-02    |
| 9072    | 100 | 17  | 0.00E+00           | 1.44E-02, 8.98E-02   | 0.00E+00, 2.60E-02   | 0.00E+00            | 1.31E-03, 3.51E-02    | 0.00E+00, 2.60E-02    |
| 9048    | 100 | 38  | 8.00E-02           | 5.31E-02, 2.08E-01   | 4.60E-02, 1.36E-01   | 1.00E-02            | 7.24E-03, 9.73E-02    | 2.00E-03, 4.40E-02    |
| 9091    | 103 | 7   | 0.00E+00           | 2.91E-03, 3.64E-02   | 0.00E+00, 2.60E-02   | 0.00E+00            | 1.75E-04, 1.20E-02    | 0.00E+00, 2.60E-02    |
| 9094    | 105 | 23  | 1.05E-01           | 2.21E-02, 1.16E-01   | 6.50E-02, 1.64E-01   | 3.80E-02            | 2.28E-03, 4.78E-02    | 1.70E-02, 8.20E-02    |
| 6238    | 106 | 28  | 8.50E-02           | 2.97E-02, 1.40E-01   | 5.00E-02, 1.40E-01   | 4.70E-02            | 3.35E-03, 6.09E-02    | 2.30E-02, 9.40E-02    |
| 9110    | 109 | 34  | 9.20E-02           | 3.90E-02, 1.67E-01   | 5.60E-02, 1.48E-01   | 2.80E-02            | 4.71E-03, 7.45E-02    | 1.10E-02, 6.70E-02    |
| 9018    | 111 | 7   | 1.80E-02           | 2.65E-03, 3.39E-02   | 6.00E-03, 5.30E-02   | 0.00E+00            | 1.47E-04, 1.09E-02    | 0.00E+00, 2.40E-02    |
| 9106    | 116 | 28  | 7.80E-02           | 2.61E-02, 1.26E-01   | 4.60E-02, 1.29E-01   | 2.60E-02            | 2.86E-03, 5.33E-02    | 1.00E-02, 6.30E-02    |
| 6245    | 130 | 17  | 3.80E-02           | 1.00E-02, 6.62E-02   | 1.90E-02, 7.70E-02   | 8.00E-03            | 8.09E-04, 2.49E-02    | 2.00E-03, 3.40E-02    |
| 9112    | 137 | 36  | 4.40E-02           | 3.07E-02, 1.37E-01   | 2.30E-02, 8.20E-02   | 7.00E-03            | 3.45E-03, 5.92E-02    | 2.00E-03, 3.20E-02    |
| 6213    | 150 | 30  | 2.70E-02           | 2.03E-02, 1.01E-01   | 1.20E-02, 5.80E-02   | 7.00E-03            | 2.00E-03, 4.15E-02    | 1.00E-03, 2.90E-02    |
| 6233    | 178 | 7   | 0.00E+00           | 1.35E-03, 1.96E-02   | 0.00E+00, 1.50E-02   | 0.00E+00            | 6.05E-05, 5.83E-03    | 0.00E+00, 1.50E-02    |
| 6231    | 186 | 30  | 2.70E-02           | 1.49E-02, 7.92E-02   | 1.30E-02, 5.40E-02   | 1.10E-02            | 1.33E-03, 3.14E-02    | 4.00E-03, 3.20E-02    |

## Equatorial Guinea

**Table E:** Model-based 95% prediction intervals (PI) for  $T$ , the proportion of individuals with parasite counts greater than 8000/ml blood the proportion of individuals with parasite counts greater than 30000/ml blood as well as the 95% confidence intervals for the true proportions based on the binomial sampling distribution of the observed numbers in each village.  $n$ , the number of individuals tested,  $Z$ , the number of individuals tested positive for *Loa Loa*, Prop<sub>8k</sub> is the observed proportion with infection levels greater than 8000mf/ml blood, Prop<sub>30k</sub> is the observed proportion with infection levels greater than 30000mf/ml blood

| Village | $n$ | $Z$ | Prop <sub>8k</sub> | 95% PI <sub>8k</sub> | 95% CI <sub>8k</sub> | Prop <sub>30k</sub> | 95% PI <sub>30k</sub> | 95% CI <sub>30k</sub> |
|---------|-----|-----|--------------------|----------------------|----------------------|---------------------|-----------------------|-----------------------|
|---------|-----|-----|--------------------|----------------------|----------------------|---------------------|-----------------------|-----------------------|

Continued on next page

Table E—continued from previous page

| Village | $n$ | $Z$ | Props <sub>k</sub> | 95% PI <sub>8k</sub> | 95% CI <sub>8k</sub> | Prop <sub>30k</sub> | 95% PI <sub>30k</sub> | 95% CI <sub>30k</sub> |
|---------|-----|-----|--------------------|----------------------|----------------------|---------------------|-----------------------|-----------------------|
| 4855    | 13  | 2   | 0.00E+00           | 2.92E-03, 1.22E-01   | 0.00E+00, 1.72E-01   | 0.00E+00            | 2.26E-04, 4.51E-02    | 0.00E+00, 1.72E-01    |
| 4857    | 18  | 5   | 0.00E+00           | 1.61E-02, 1.82E-01   | 0.00E+00, 1.31E-01   | 0.00E+00            | 1.76E-03, 7.60E-02    | 0.00E+00, 1.31E-01    |
| 4851    | 19  | 0   | 0.00E+00           | 5.14E-05, 2.88E-02   | 0.00E+00, 1.25E-01   | 0.00E+00            | 9.67E-07, 7.81E-03    | 0.00E+00, 1.25E-01    |
| 4866    | 22  | 5   | 1.82E-01           | 1.20E-02, 1.48E-01   | 8.40E-02, 3.49E-01   | 0.00E+00            | 1.25E-03, 5.95E-02    | 0.00E+00, 1.10E-01    |
| 4861    | 22  | 6   | 0.00E+00           | 1.79E-02, 1.74E-01   | 0.00E+00, 1.10E-01   | 0.00E+00            | 2.02E-03, 7.25E-02    | 0.00E+00, 1.10E-01    |
| 4860    | 22  | 7   | 0.00E+00           | 2.41E-02, 2.01E-01   | 0.00E+00, 1.10E-01   | 0.00E+00            | 2.95E-03, 8.66E-02    | 0.00E+00, 1.10E-01    |
| 4843    | 35  | 3   | 2.90E-02           | 2.27E-03, 5.94E-02   | 6.00E-03, 1.18E-01   | 0.00E+00            | 1.45E-04, 2.00E-02    | 0.00E+00, 7.20E-02    |
| 4853    | 36  | 7   | 0.00E+00           | 1.22E-02, 1.18E-01   | 0.00E+00, 7.00E-02   | 0.00E+00            | 1.22E-03, 4.69E-02    | 0.00E+00, 7.00E-02    |
| 4858    | 37  | 2   | 0.00E+00           | 9.27E-04, 4.20E-02   | 0.00E+00, 6.80E-02   | 0.00E+00            | 4.42E-05, 1.30E-02    | 0.00E+00, 6.80E-02    |
| 4848    | 37  | 6   | 0.00E+00           | 8.72E-03, 9.93E-02   | 0.00E+00, 6.80E-02   | 0.00E+00            | 7.84E-04, 3.79E-02    | 0.00E+00, 6.80E-02    |
| 4847    | 38  | 3   | 0.00E+00           | 2.01E-03, 5.44E-02   | 0.00E+00, 6.60E-02   | 0.00E+00            | 1.24E-04, 1.80E-02    | 0.00E+00, 6.60E-02    |
| 4864    | 44  | 10  | 0.00E+00           | 1.83E-02, 1.33E-01   | 0.00E+00, 5.80E-02   | 0.00E+00            | 1.91E-03, 5.43E-02    | 0.00E+00, 5.80E-02    |
| 4844    | 44  | 13  | 6.80E-02           | 2.91E-02, 1.70E-01   | 2.80E-02, 1.59E-01   | 0.00E+00            | 3.46E-03, 7.41E-02    | 0.00E+00, 5.80E-02    |
| 4852    | 46  | 11  | 0.00E+00           | 2.04E-02, 1.39E-01   | 0.00E+00, 5.60E-02   | 0.00E+00            | 2.14E-03, 5.72E-02    | 0.00E+00, 5.60E-02    |
| 4845    | 51  | 10  | 2.00E-02           | 1.50E-02, 1.12E-01   | 4.00E-03, 8.30E-02   | 0.00E+00            | 1.46E-03, 4.49E-02    | 0.00E+00, 5.00E-02    |
| 4849    | 56  | 0   | 0.00E+00           | 2.83E-05, 1.04E-02   | 0.00E+00, 4.60E-02   | 0.00E+00            | 3.78E-07, 2.35E-03    | 0.00E+00, 4.60E-02    |
| 4850    | 60  | 2   | 0.00E+00           | 5.20E-04, 2.54E-02   | 0.00E+00, 4.30E-02   | 0.00E+00            | 1.99E-05, 7.19E-03    | 0.00E+00, 4.30E-02    |
| 4859    | 60  | 3   | 0.00E+00           | 1.17E-03, 3.35E-02   | 0.00E+00, 4.30E-02   | 0.00E+00            | 5.70E-05, 1.02E-02    | 0.00E+00, 4.30E-02    |
| 4862    | 64  | 8   | 1.60E-02           | 7.23E-03, 7.07E-02   | 3.00E-03, 6.70E-02   | 0.00E+00            | 5.71E-04, 2.59E-02    | 0.00E+00, 4.10E-02    |
| 4846    | 83  | 12  | 0.00E+00           | 1.03E-02, 7.80E-02   | 0.00E+00, 3.20E-02   | 0.00E+00            | 8.88E-04, 2.94E-02    | 0.00E+00, 3.20E-02    |
| 4842    | 85  | 12  | 1.20E-02           | 1.00E-02, 7.64E-02   | 3.00E-03, 5.10E-02   | 0.00E+00            | 8.35E-04, 2.84E-02    | 0.00E+00, 3.10E-02    |
| 4863    | 87  | 9   | 0.00E+00           | 5.86E-03, 5.61E-02   | 0.00E+00, 3.00E-02   | 0.00E+00            | 4.18E-04, 1.97E-02    | 0.00E+00, 3.00E-02    |
| 4841    | 88  | 11  | 1.10E-02           | 8.30E-03, 6.73E-02   | 3.00E-03, 4.90E-02   | 0.00E+00            | 6.53E-04, 2.46E-02    | 0.00E+00, 3.00E-02    |
| 4856    | 94  | 13  | 3.20E-02           | 1.01E-02, 7.33E-02   | 1.30E-02, 7.70E-02   | 0.00E+00            | 8.21E-04, 2.77E-02    | 0.00E+00, 2.80E-02    |
| 4854    | 107 | 23  | 0.00E+00           | 2.14E-02, 1.12E-01   | 0.00E+00, 2.50E-02   | 0.00E+00            | 2.22E-03, 4.65E-02    | 0.00E+00, 2.50E-02    |

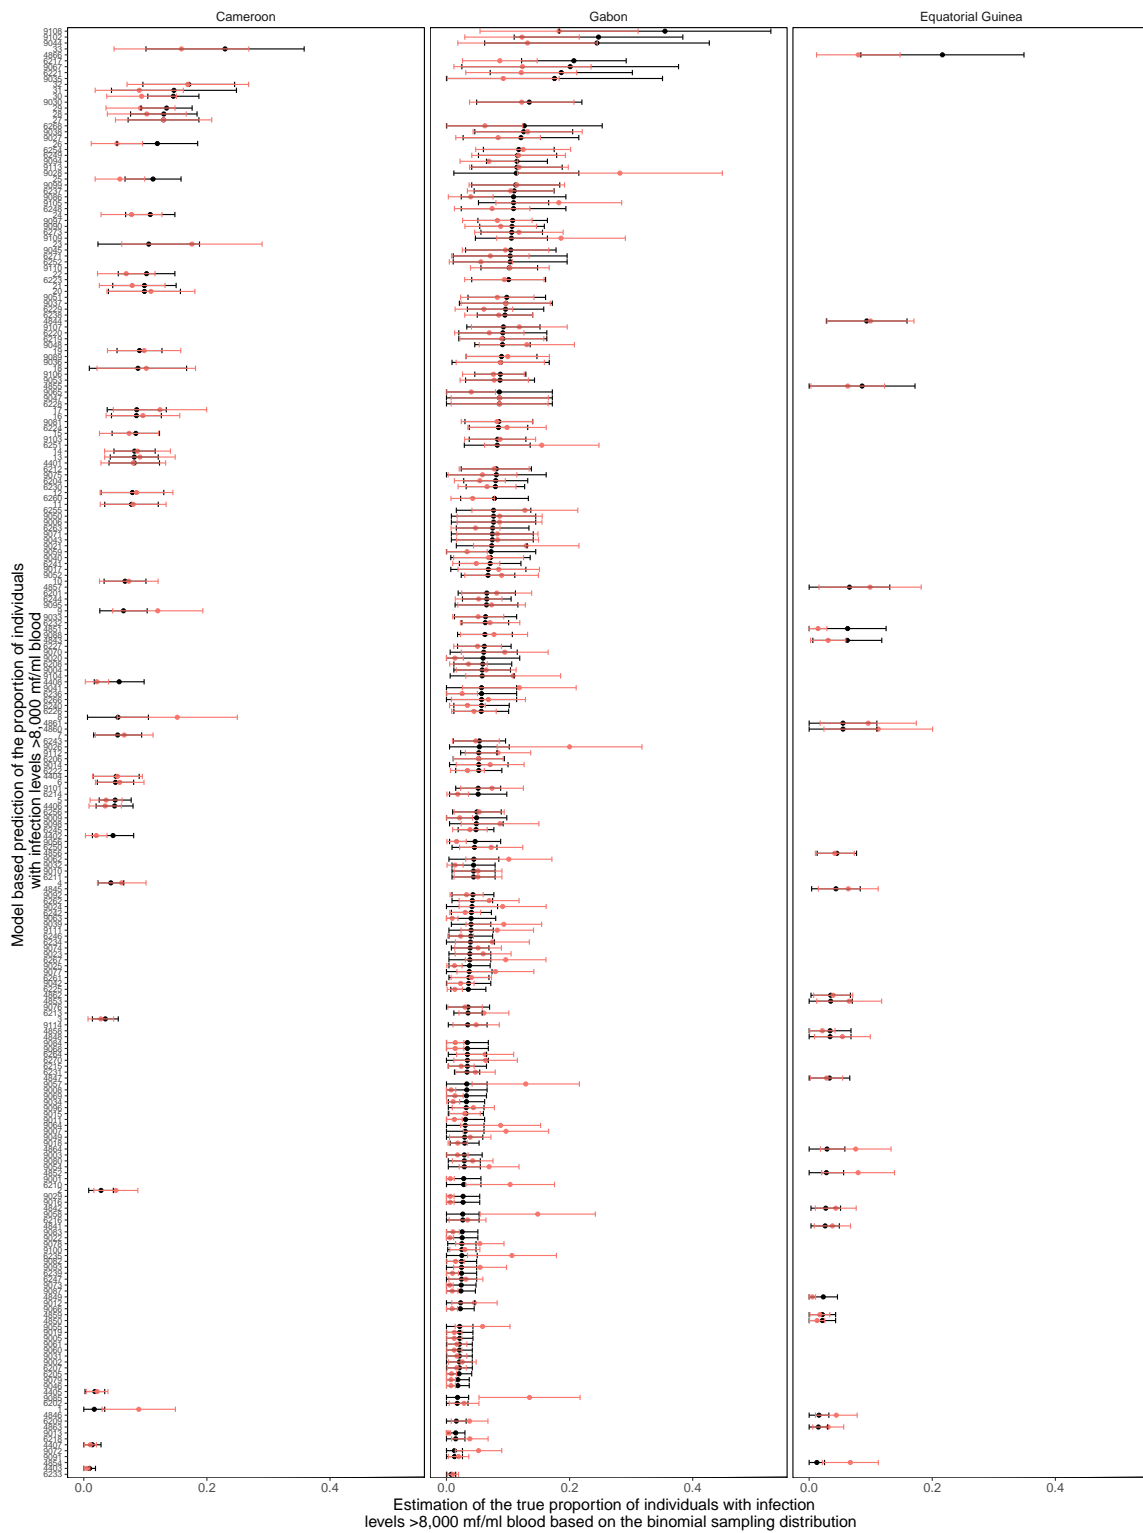

**Figure E:** Comparison of the proportion of individuals with more than 8,000 microfilariae per ml blood as predicted by the model based on the observed prevalence in a sample and the binomial sampling distribution based on the observed proportion in a sample. The black dots and lines are the centre and the extent of the 95% confidence interval of the binomial sampling distribution. The red dots and lines are the centre and extend of the 95% predicted interval.



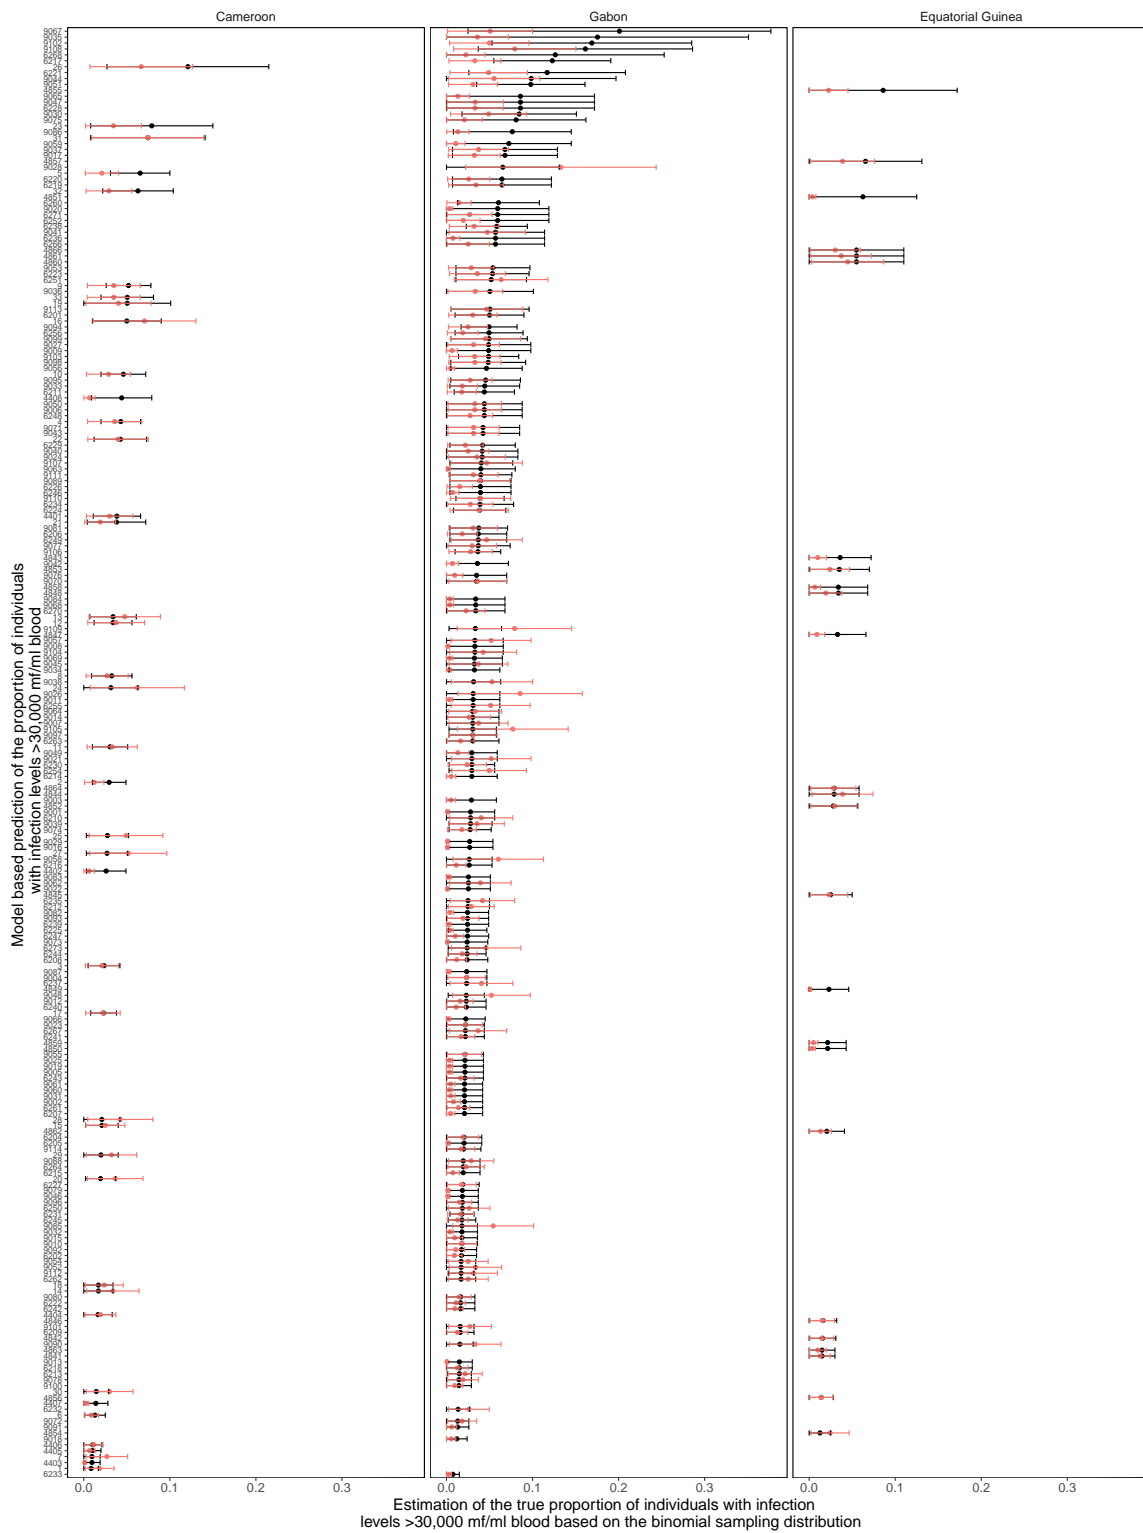

**Figure F:** Comparison of the proportion of individuals with more than 30,000 microfilariae per ml blood as predicted by the model based on the observed prevalence in a sample and the binomial sampling distribution based on the observed proportion in a sample. The black dots and lines are the centre and the extent of the 95% confidence interval of the binomial sampling distribution. The red dots and lines are the centre and extend of the 95% predicted interval.
